# Supplementary material
Source: PubMed Central journal article supplement (PMC9297576)

## Supporting Information

### **Synthesis and evaluation of three azide-modified disaccharide oxazolines as enzyme substrates for single-step Fc glycan-mediated antibody-drug conjugation**

Xiao Zhang, Chong Ou, Huiying Liu, Lai-Xi Wang \*

Department of Chemistry and Biochemistry, University of Maryland, 8051 Regents Drive, College Park, Maryland 20742, United States.

\*Corresponding author: Email: [wang518@umd.edu](mailto:wang518@umd.edu)

## Contents

|                                                                                            |     |
|--------------------------------------------------------------------------------------------|-----|
| Figure S1: LC-MS tracking of transglycosylation reactions with azido-sugar oxazolines..... | S3  |
| Figure S2: LC-MS analysis of compound <b>25</b> .....                                      | S4  |
| Figure S3: LC-MS analysis of compound <b>26</b> .....                                      | S5  |
| Figure S4: LC-MS analysis of compound <b>27</b> .....                                      | S6  |
| Figure S5: LC-MS tracking of transglycosylation reactions with drug-sugar oxazolines.....  | S7  |
| Figure S6: LC-MS analysis of compound <b>33</b> .....                                      | S8  |
| Figure S7: LC-MS analysis of compound <b>34</b> .....                                      | S9  |
| Figure S8: LC-MS analysis of compound <b>35</b> .....                                      | S10 |
| NMR spectra.....                                                                           | S11 |

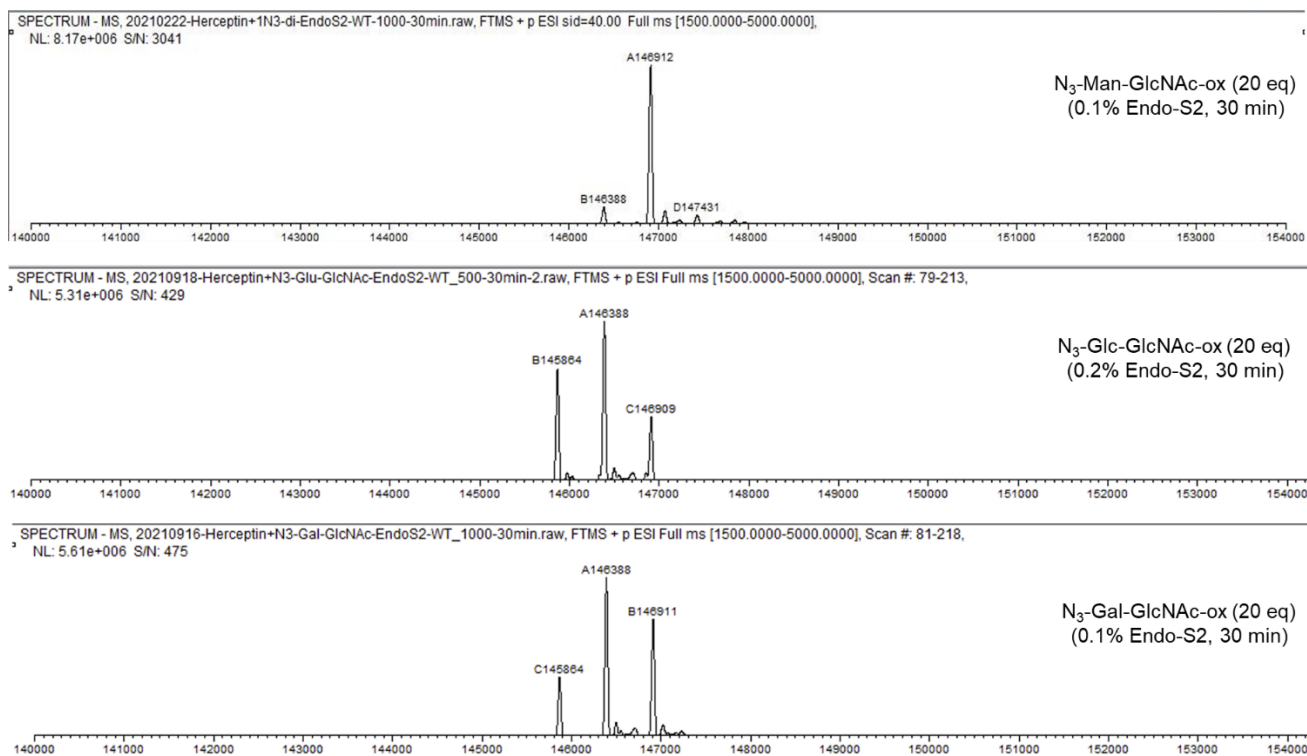

**Figure S1. LC-MS tracking of the transglycosylation reactions with azido-sugar oxazolines.**

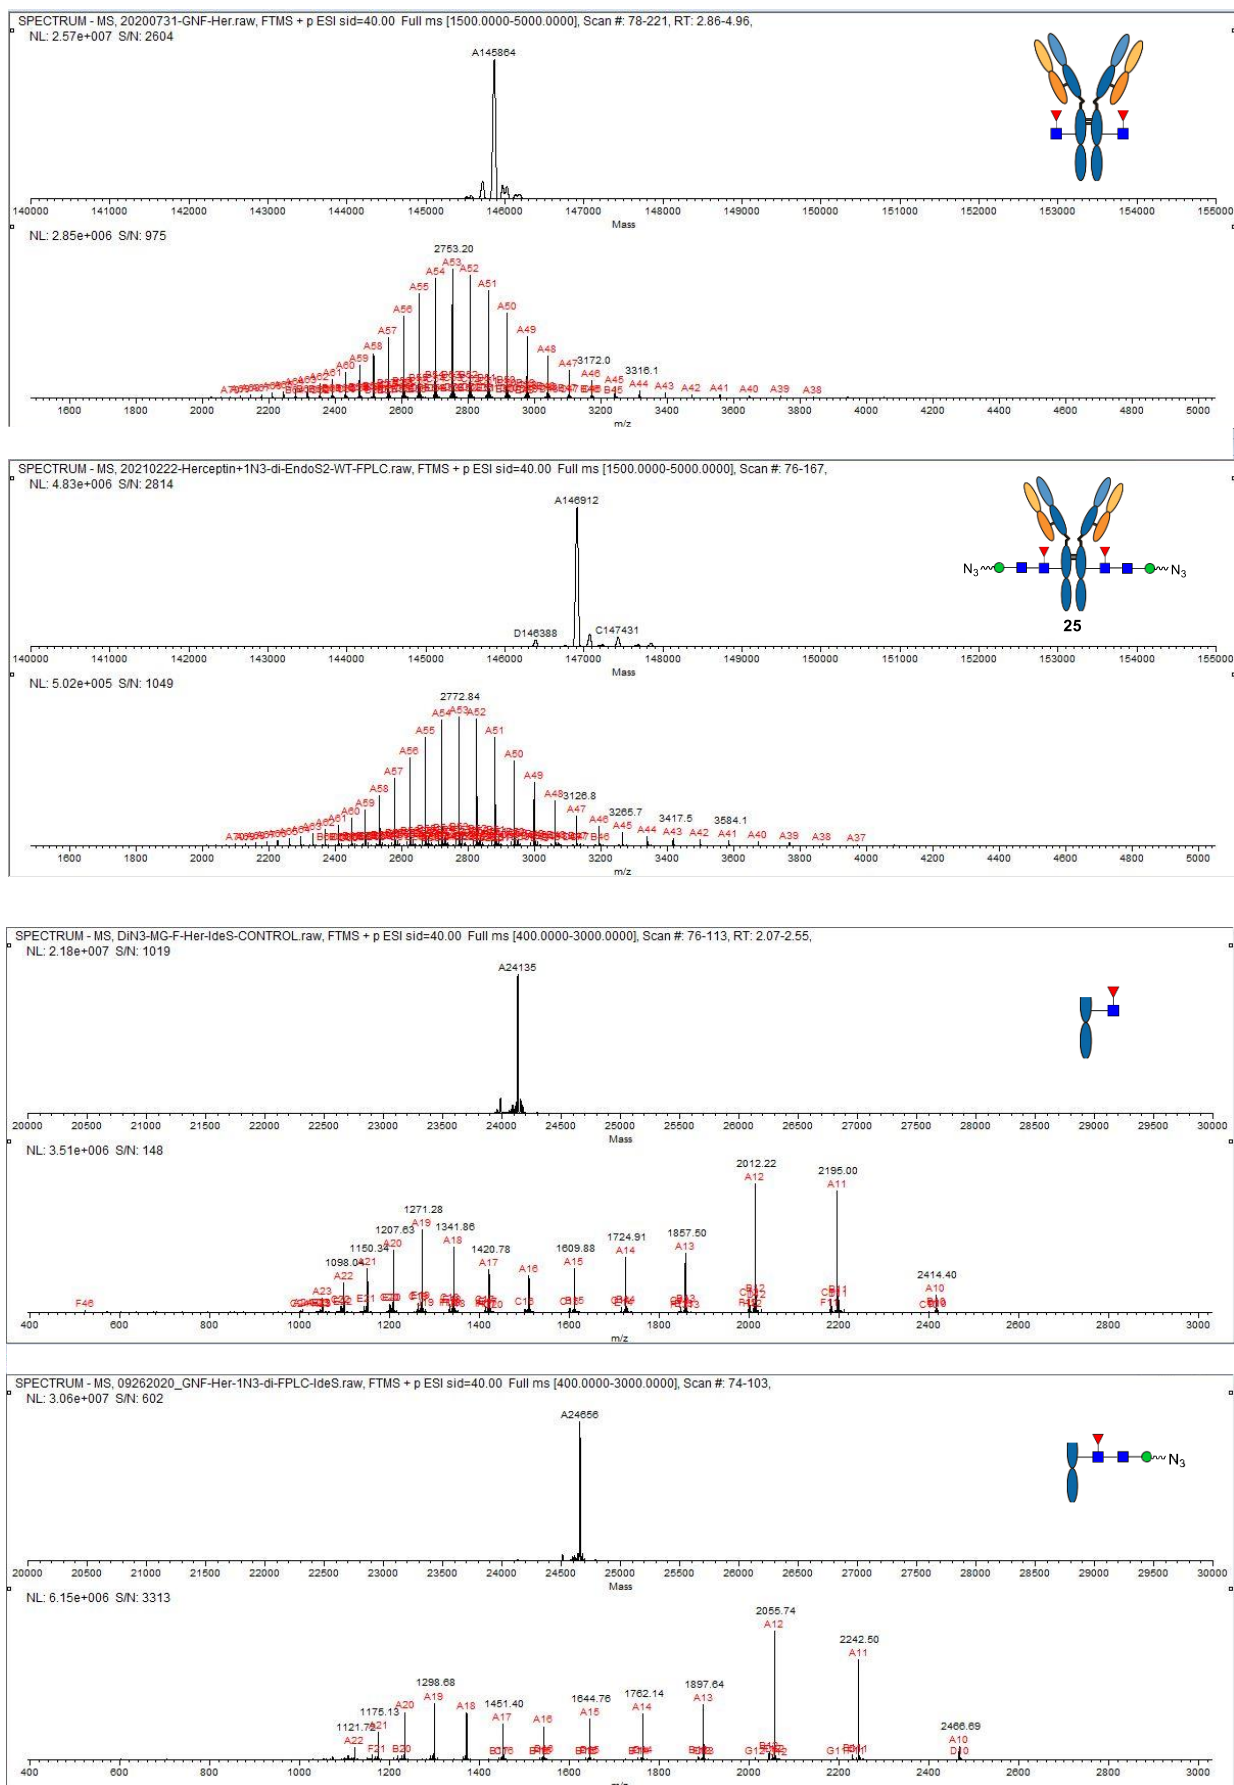

Figure S2. LC-MS analysis of compound 25.

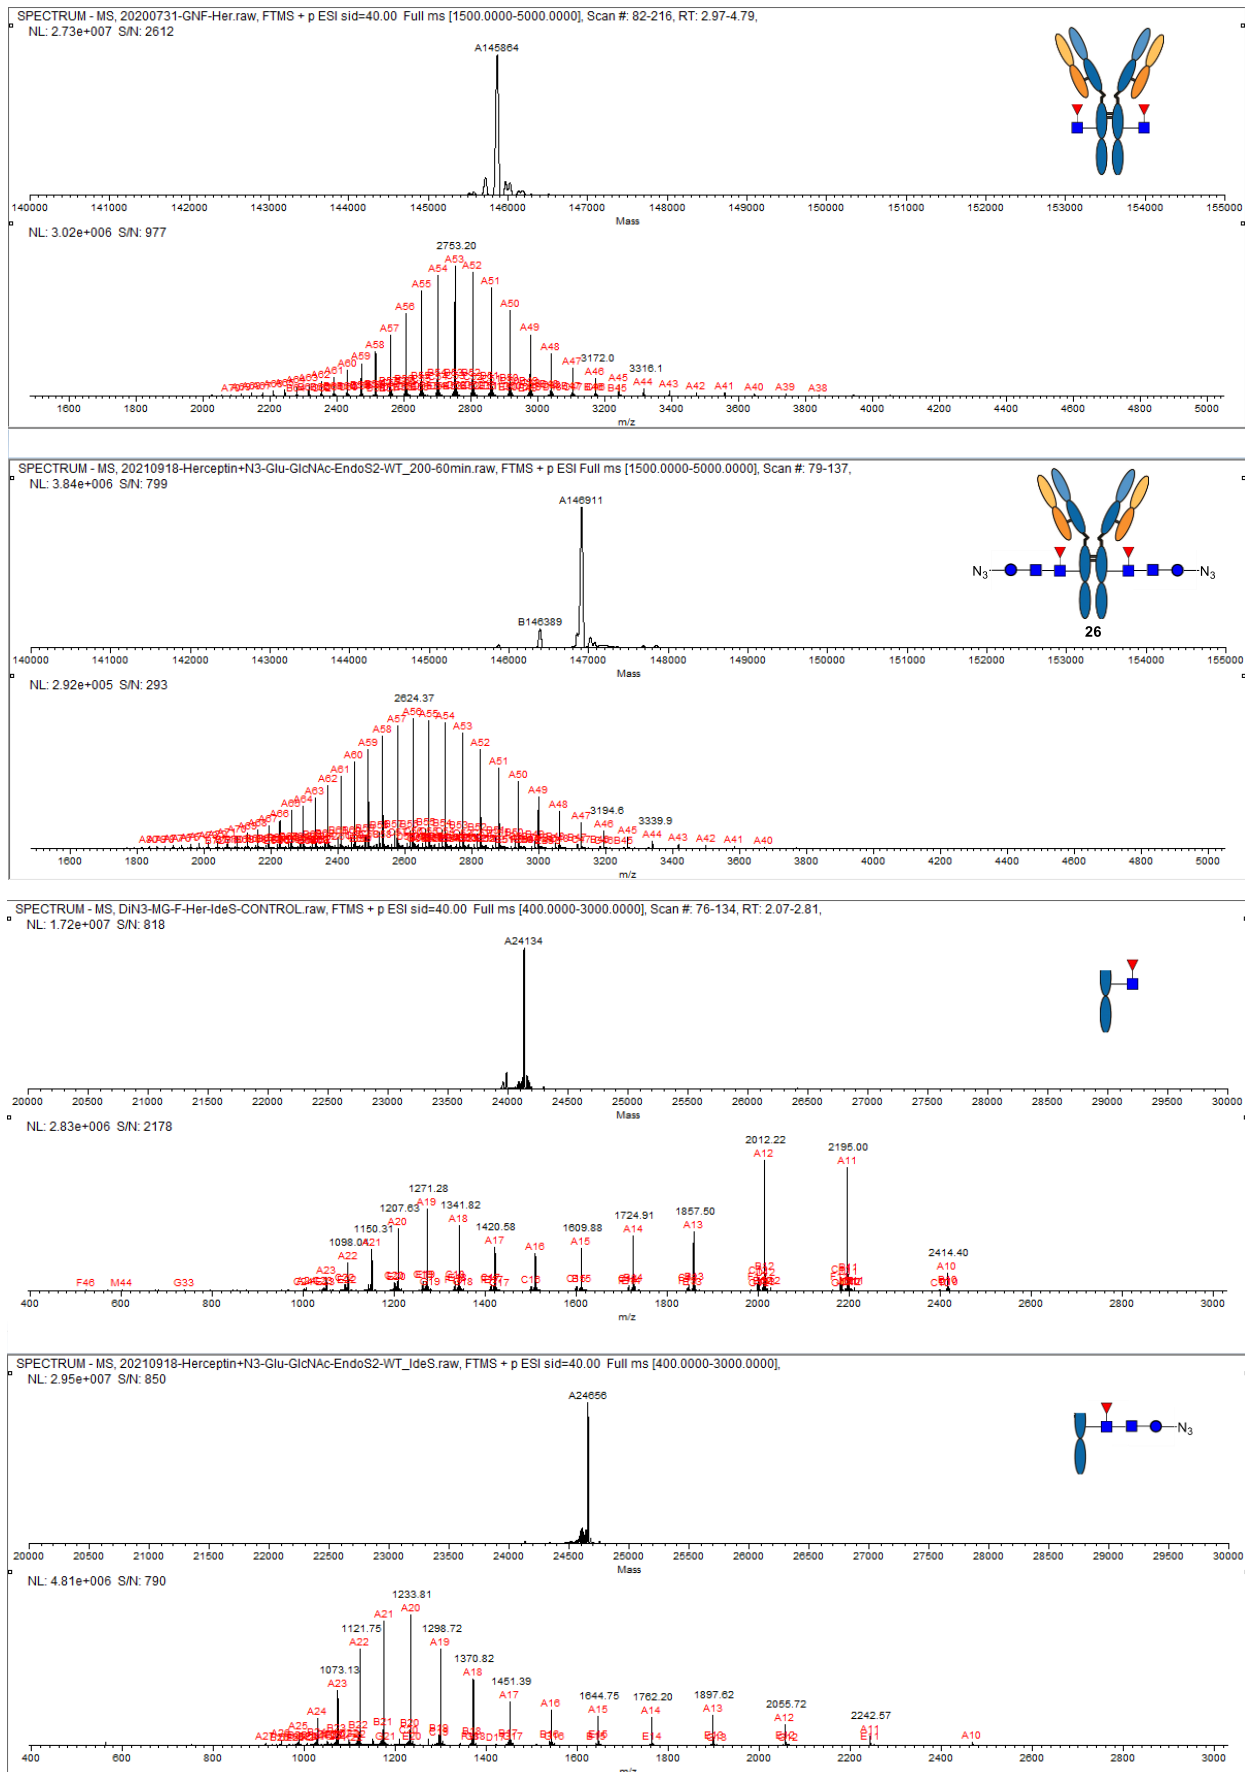

Figure S3. LC-MS analysis of compound 26.

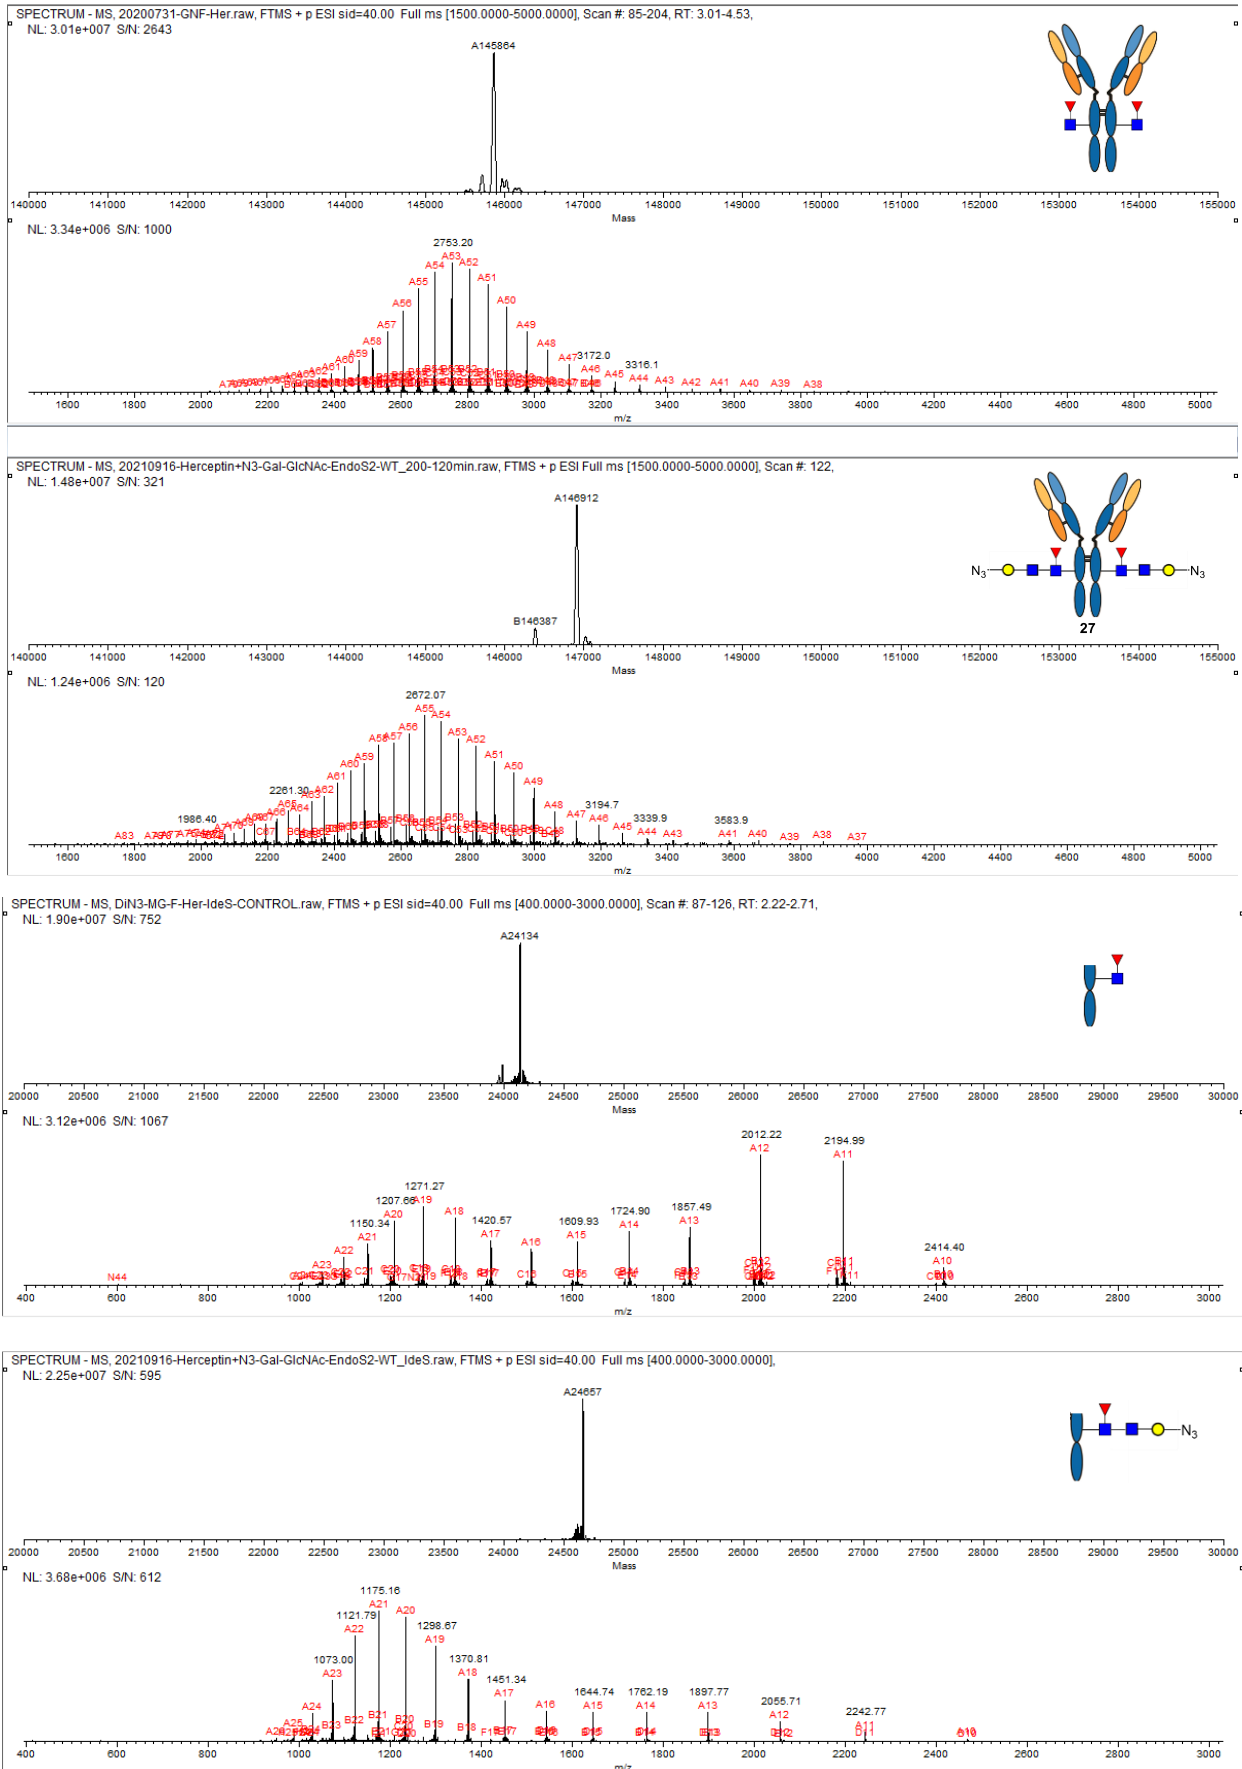

Figure S4. LC-MS analysis of compound 27.

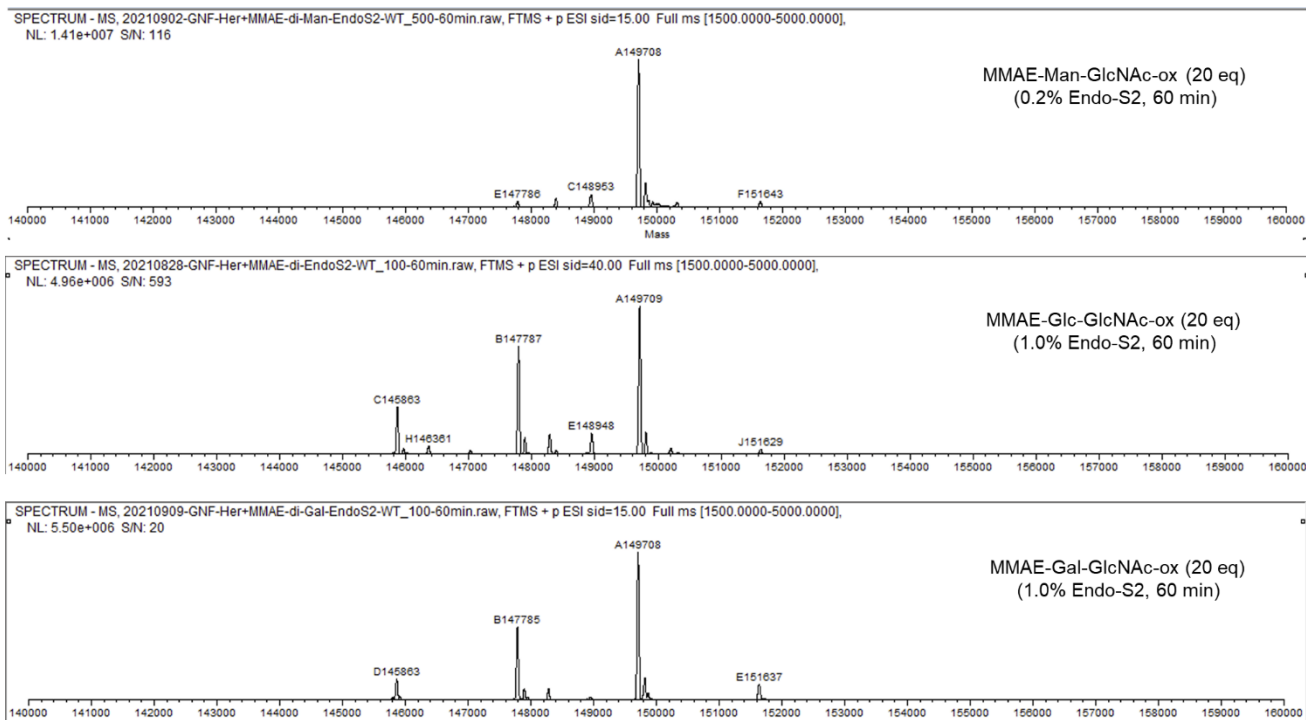

**Figure S5. LC-MS tracking of the transglycosylation reactions with drug-sugar oxazolines.**

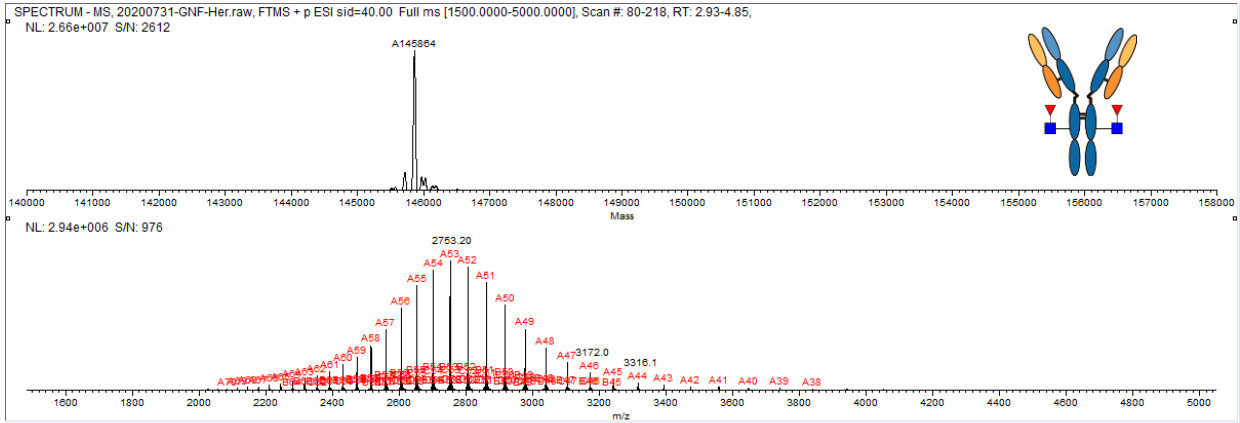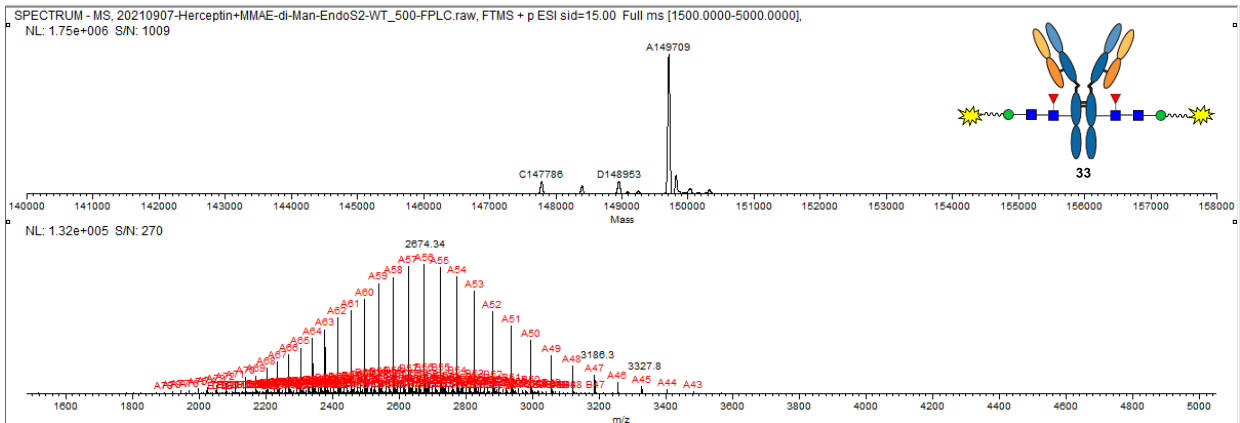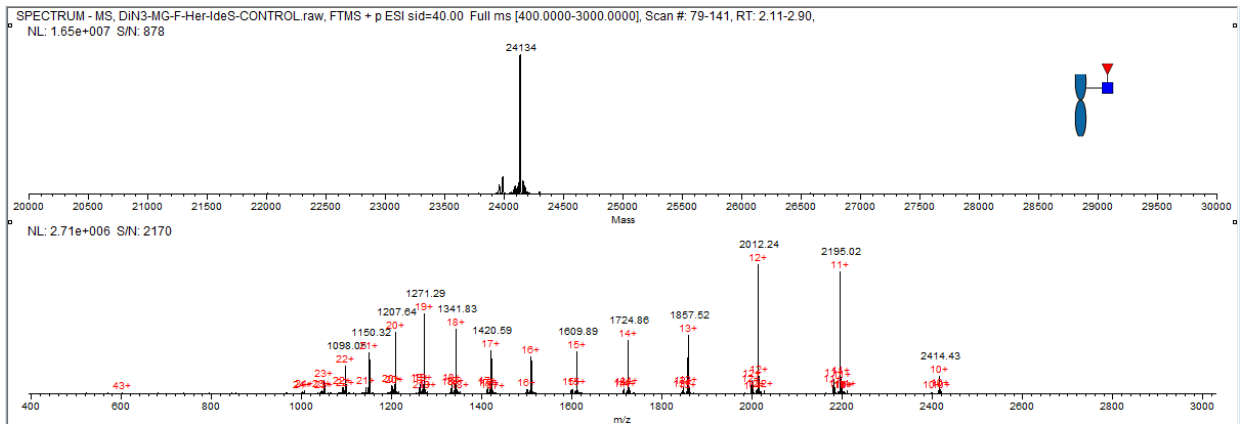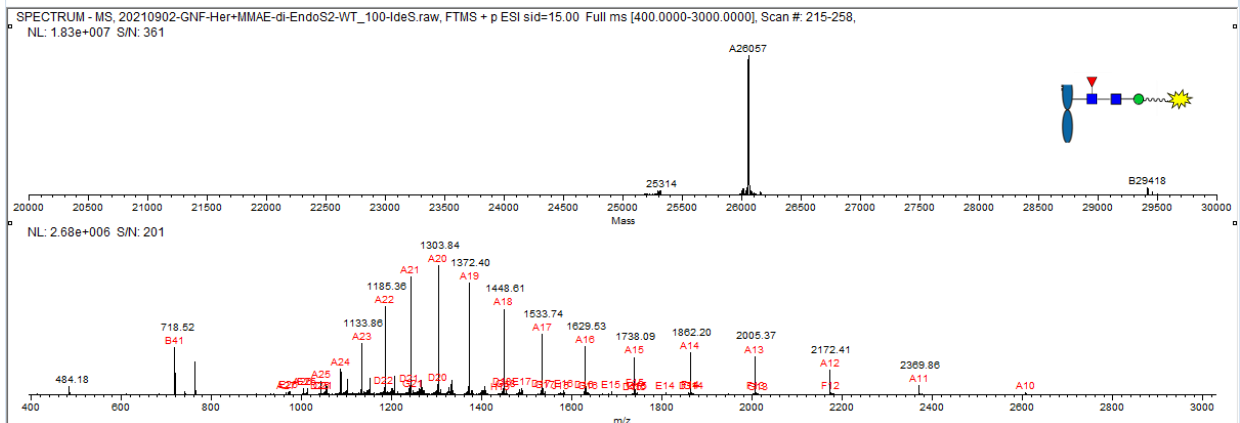

Figure S6. LC-MS analysis of compound 33.



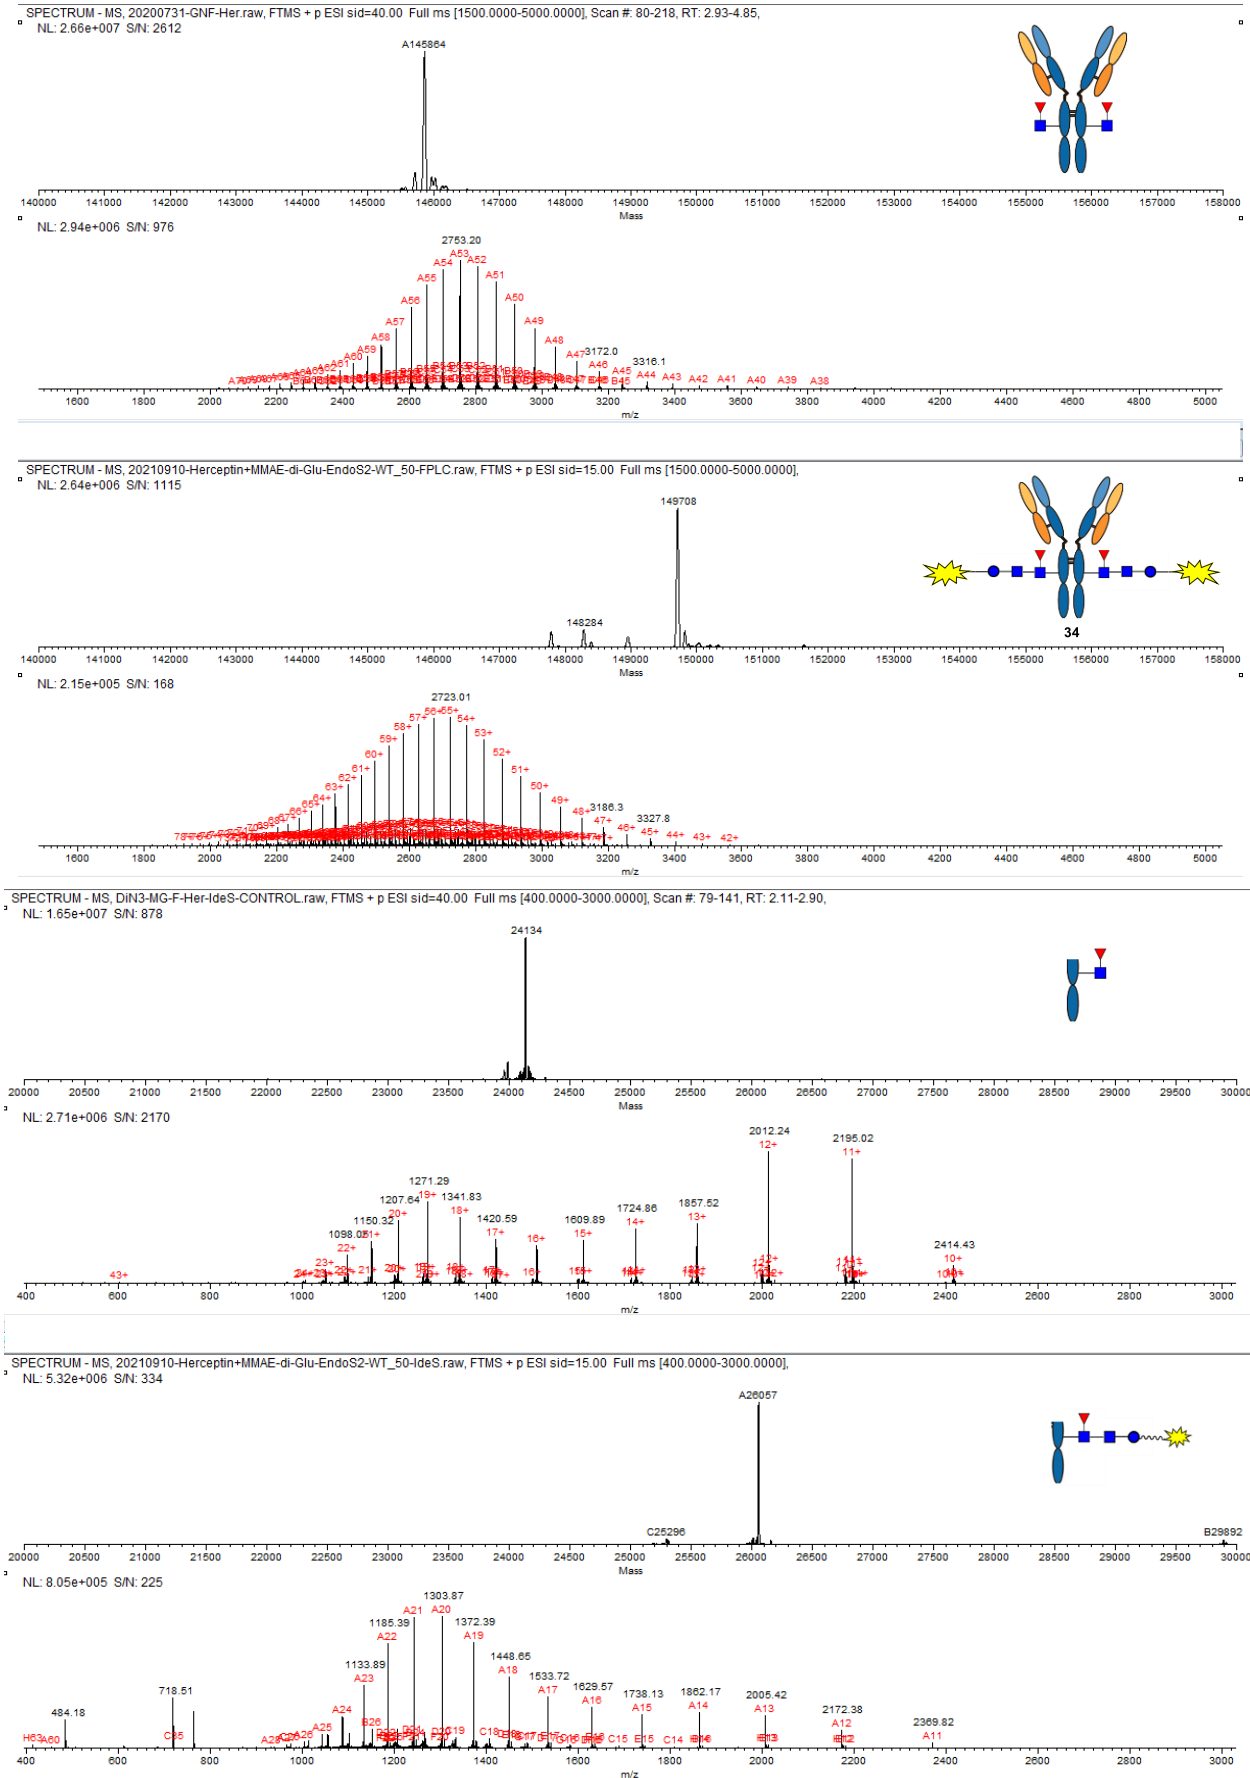

Figure S7. LC-MS analysis of compound 34.

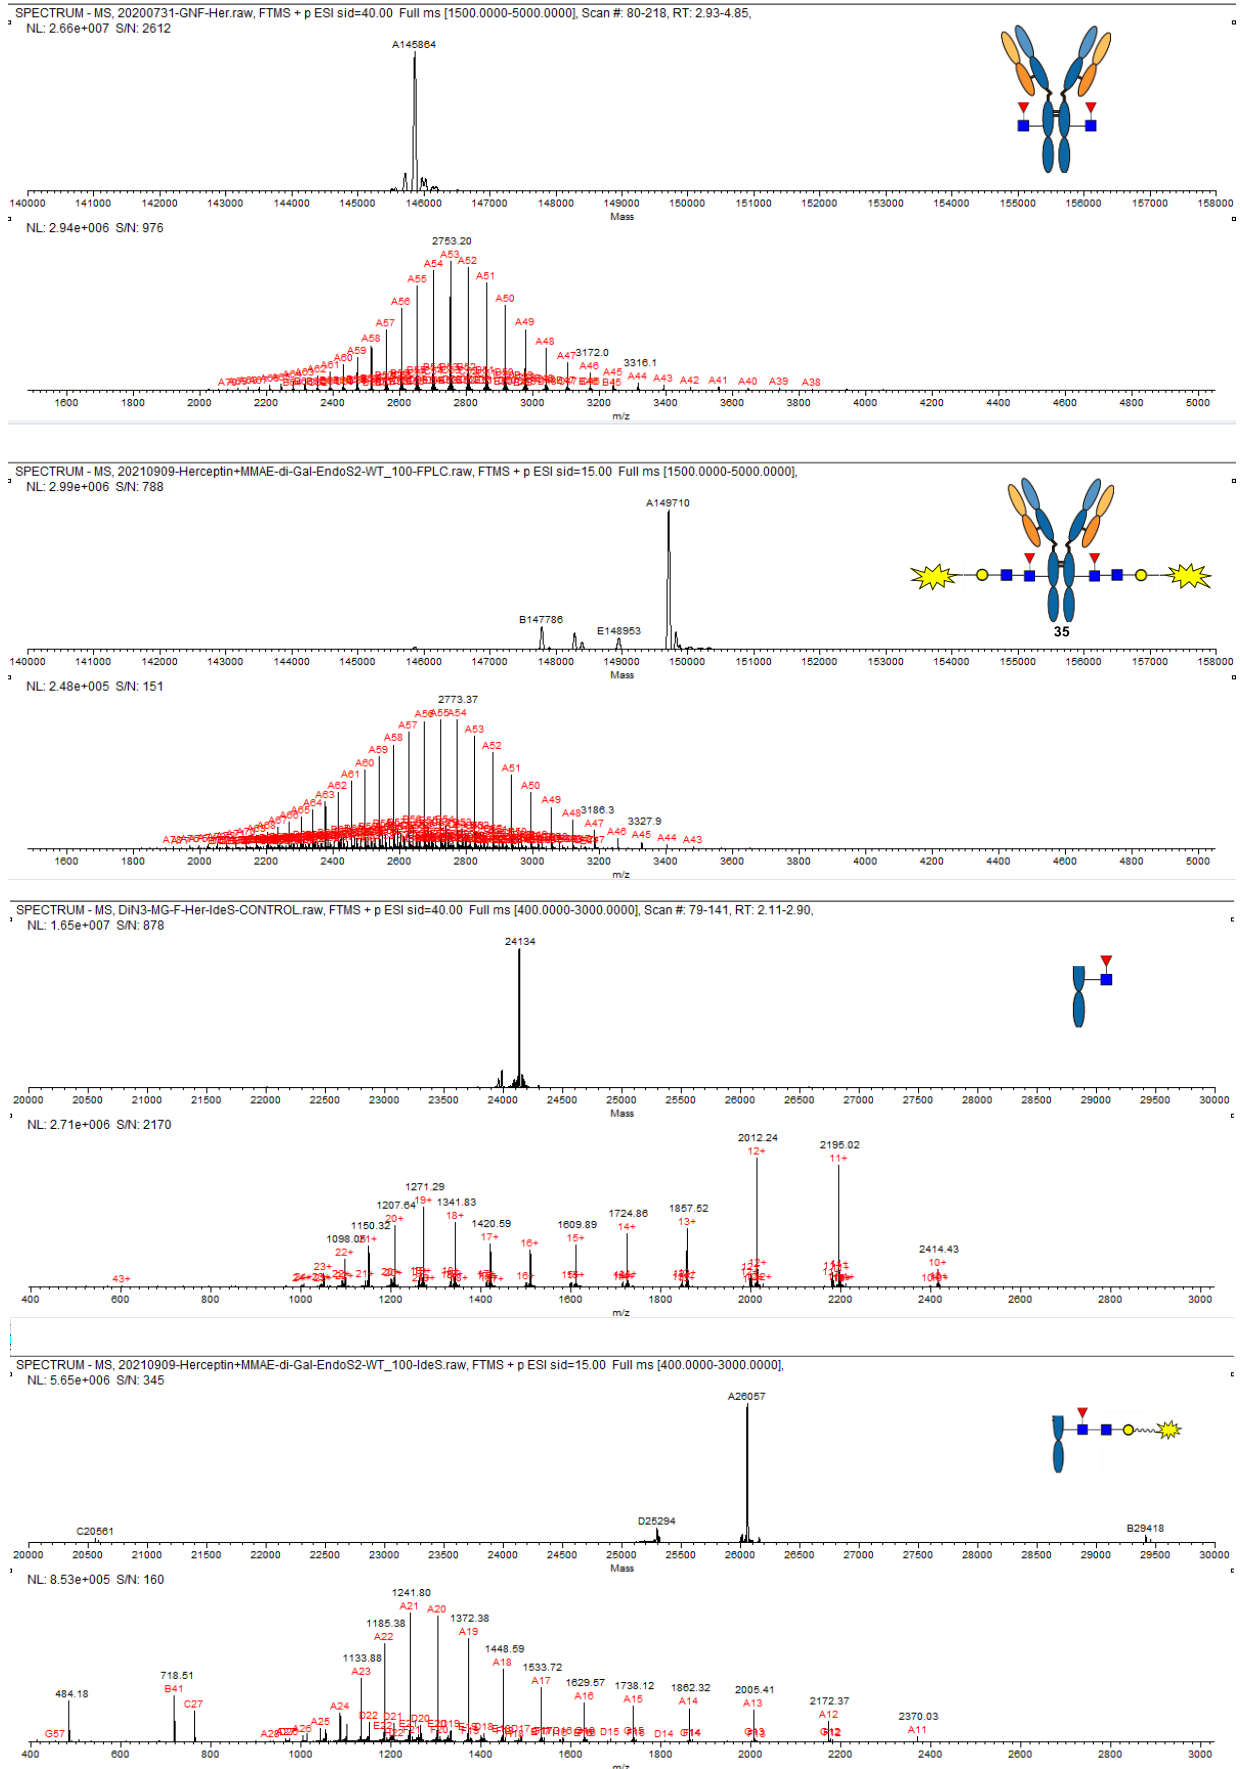

Figure S8. LC-MS analysis of compound 35.

# NMR Spectra

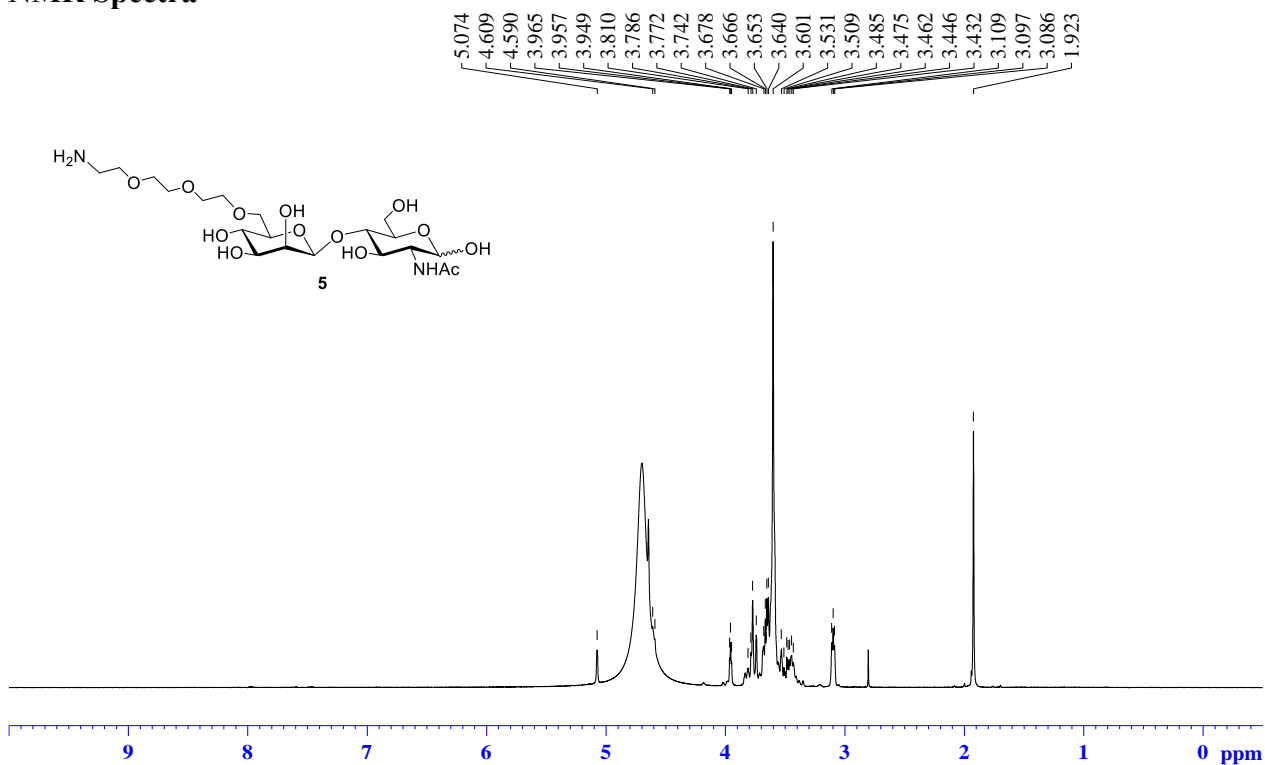

Compound 5: <sup>1</sup>H NMR (D<sub>2</sub>O, 400 MHz)

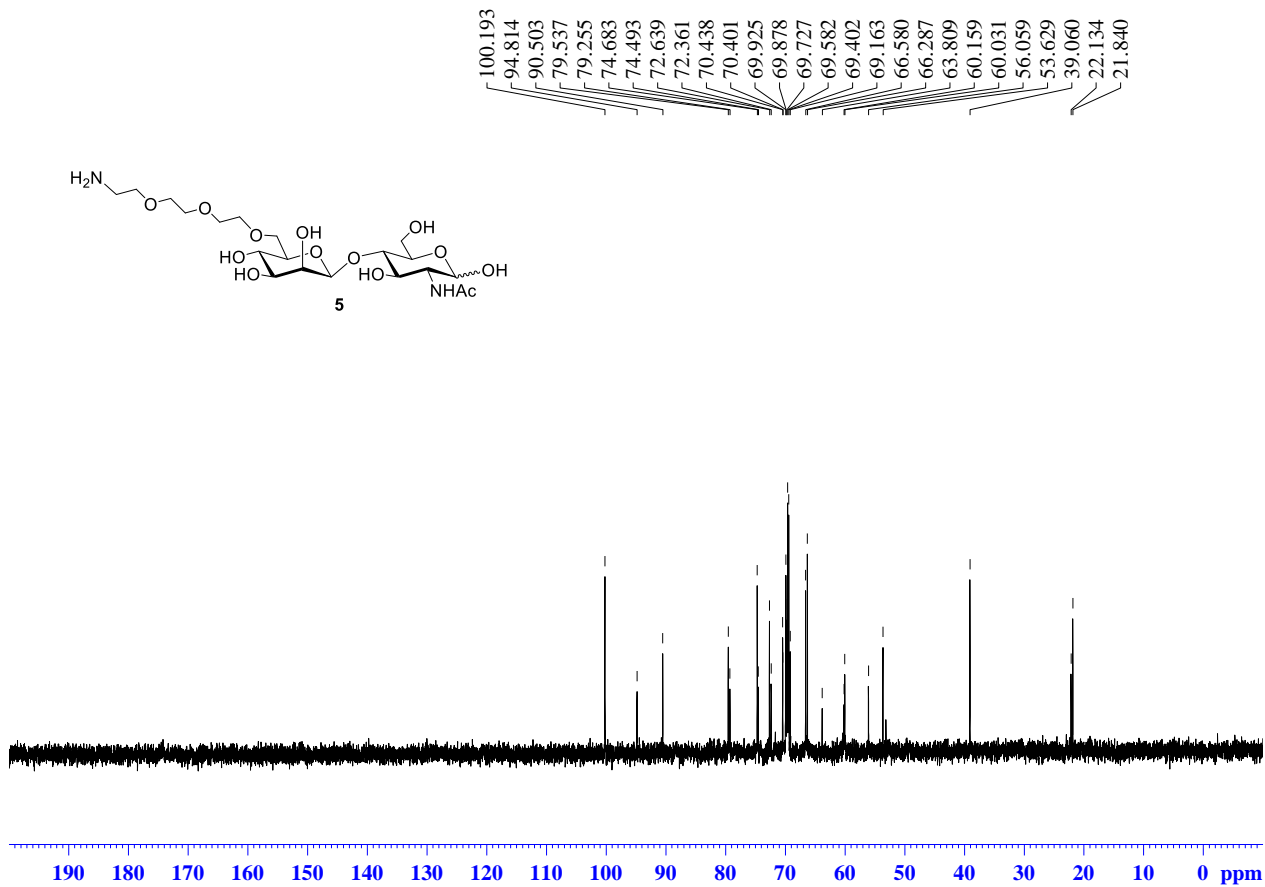

Compound 5: <sup>13</sup>C NMR (D<sub>2</sub>O, 100 MHz)

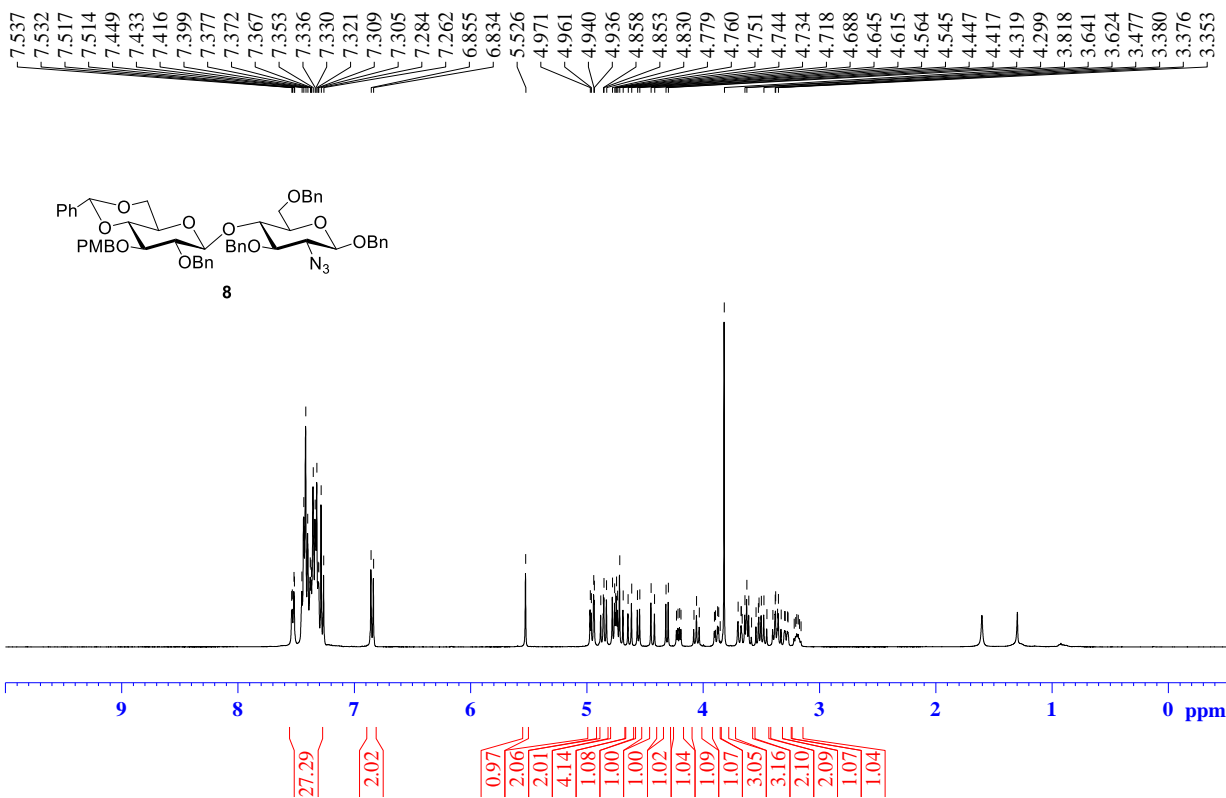

Compound 8:  $^1\text{H}$  NMR ( $\text{CDCl}_3$ , 400 MHz)

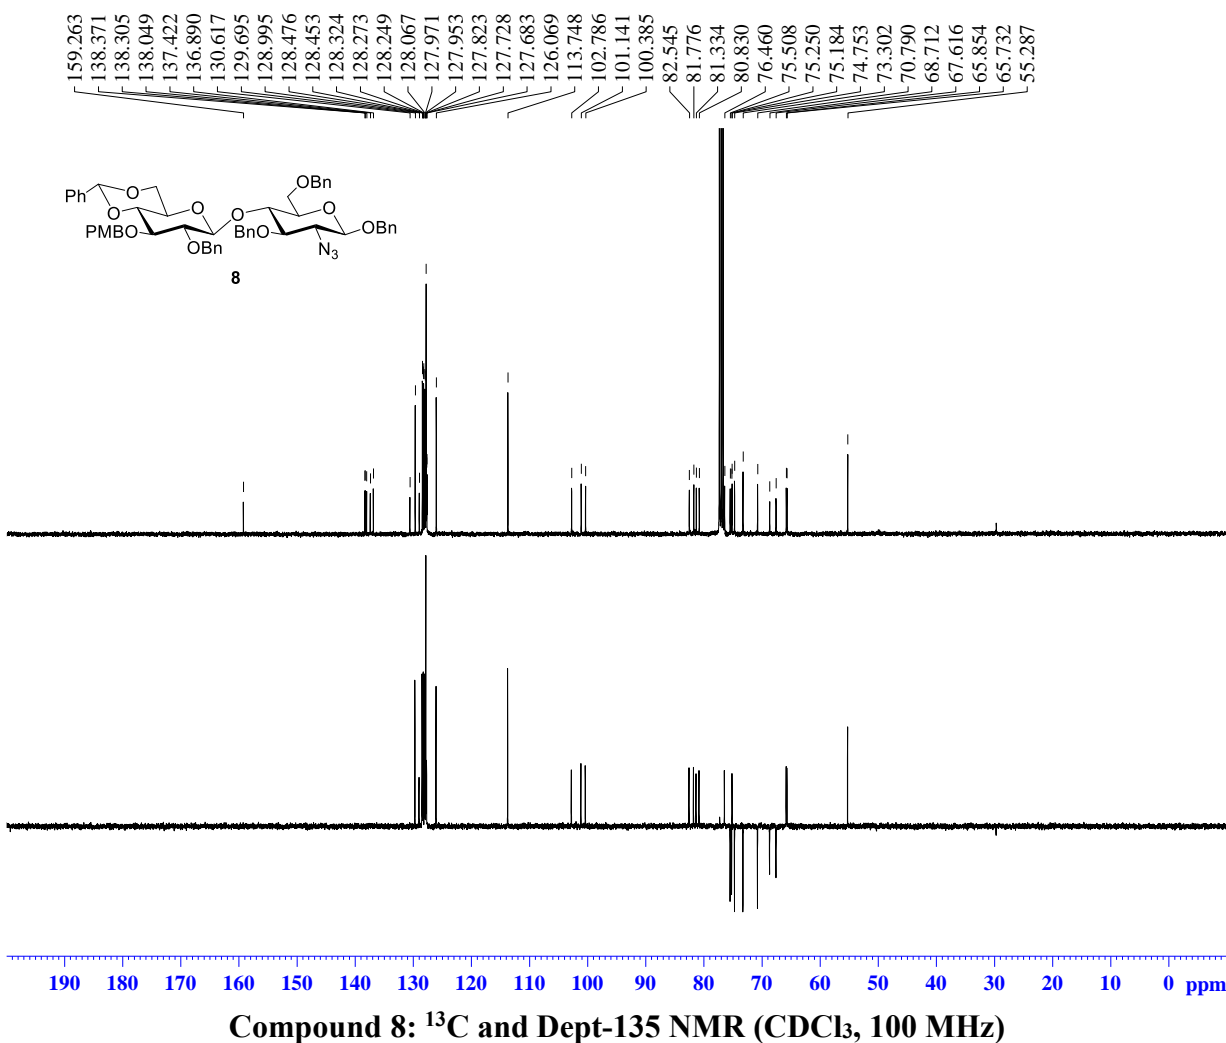

Compound 8:  $^{13}\text{C}$  and Dept- $^{135}\text{C}$  NMR ( $\text{CDCl}_3$ , 100 MHz)

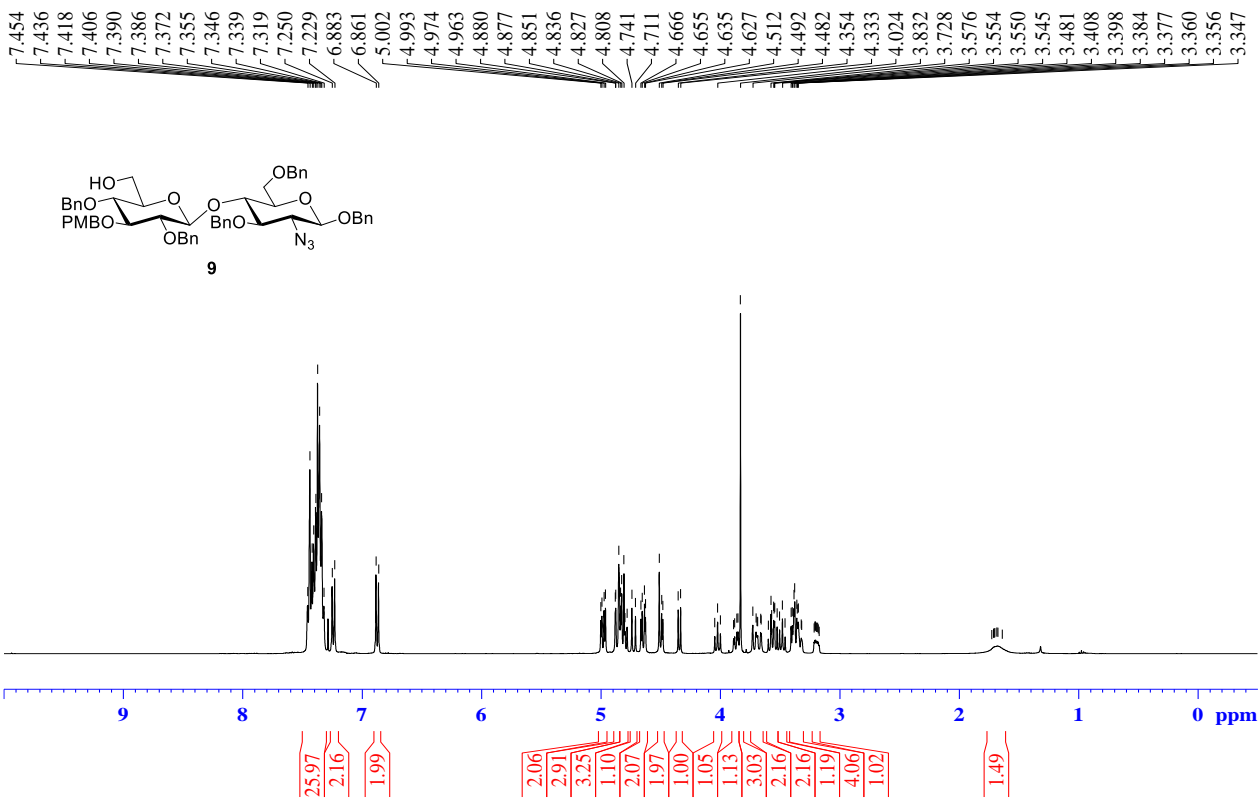

Compound 9:  $^1\text{H}$  NMR ( $\text{CDCl}_3$ , 400 MHz)

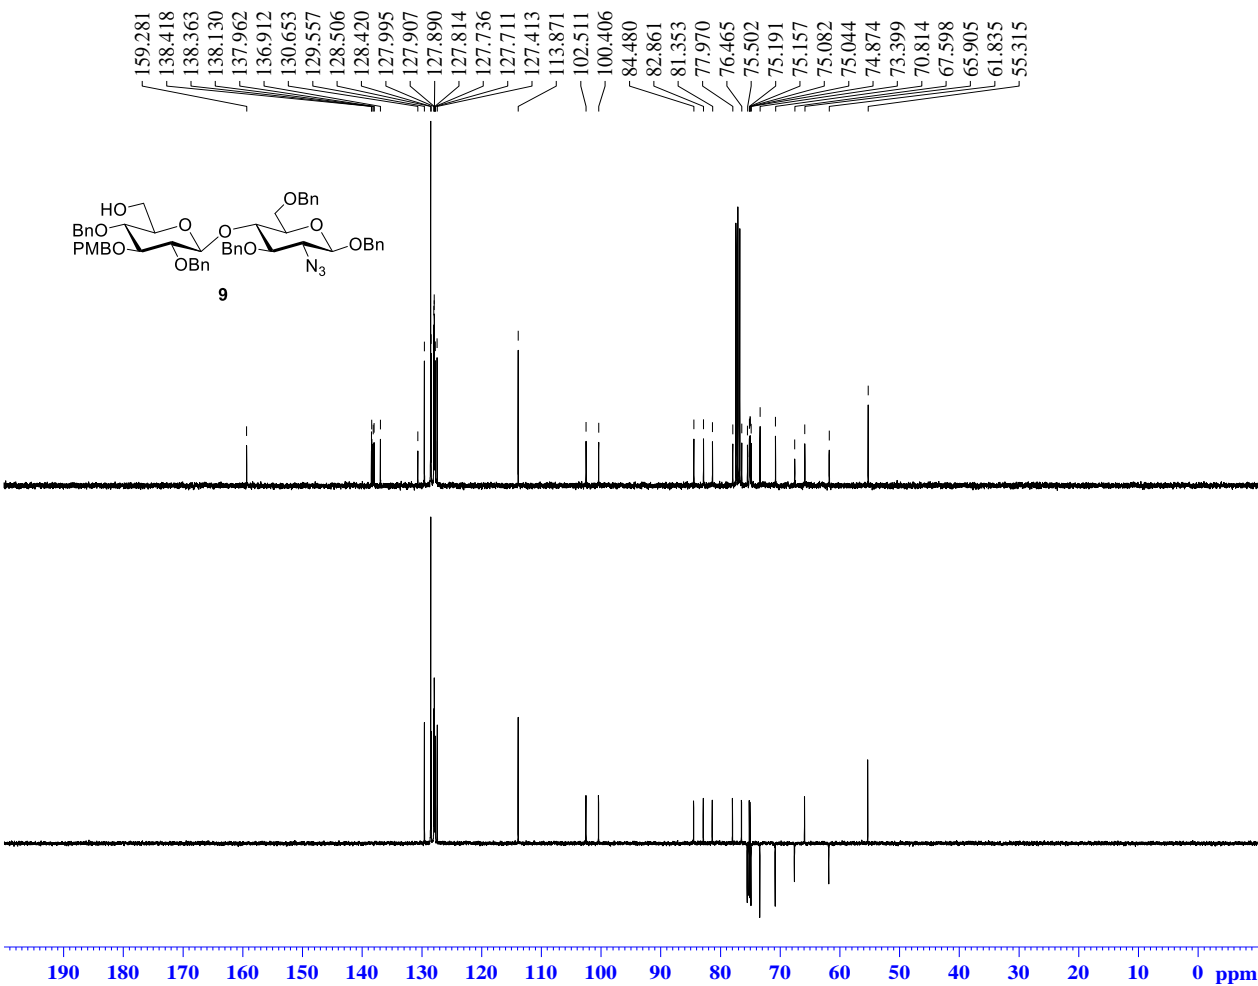

Compound 9:  $^{13}\text{C}$  and Dept-135 NMR ( $\text{CDCl}_3$ , 100 MHz)

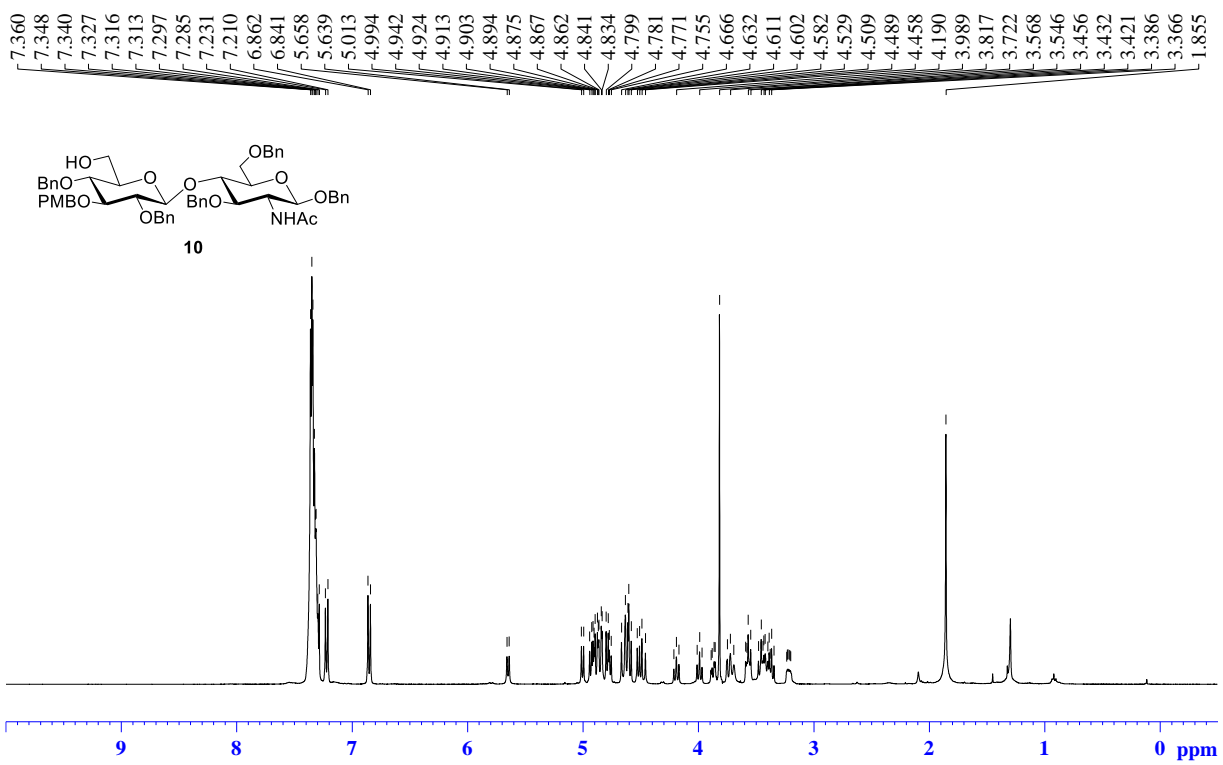

Compound 10: <sup>1</sup>H NMR (CDCl<sub>3</sub>, 400 MHz)

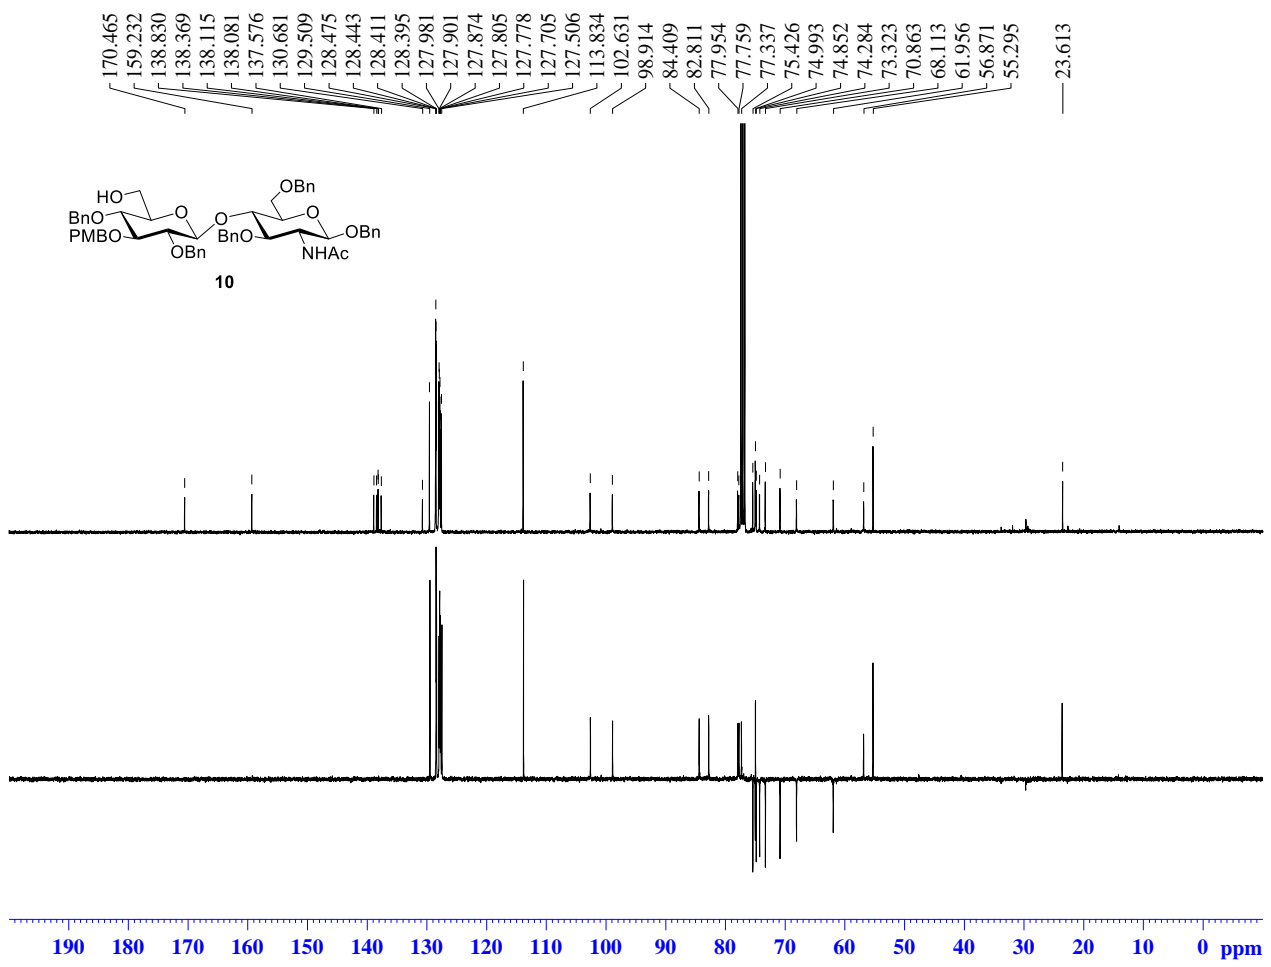

Compound 10: <sup>13</sup>C and Dept-135 NMR (CDCl<sub>3</sub>, 100 MHz)

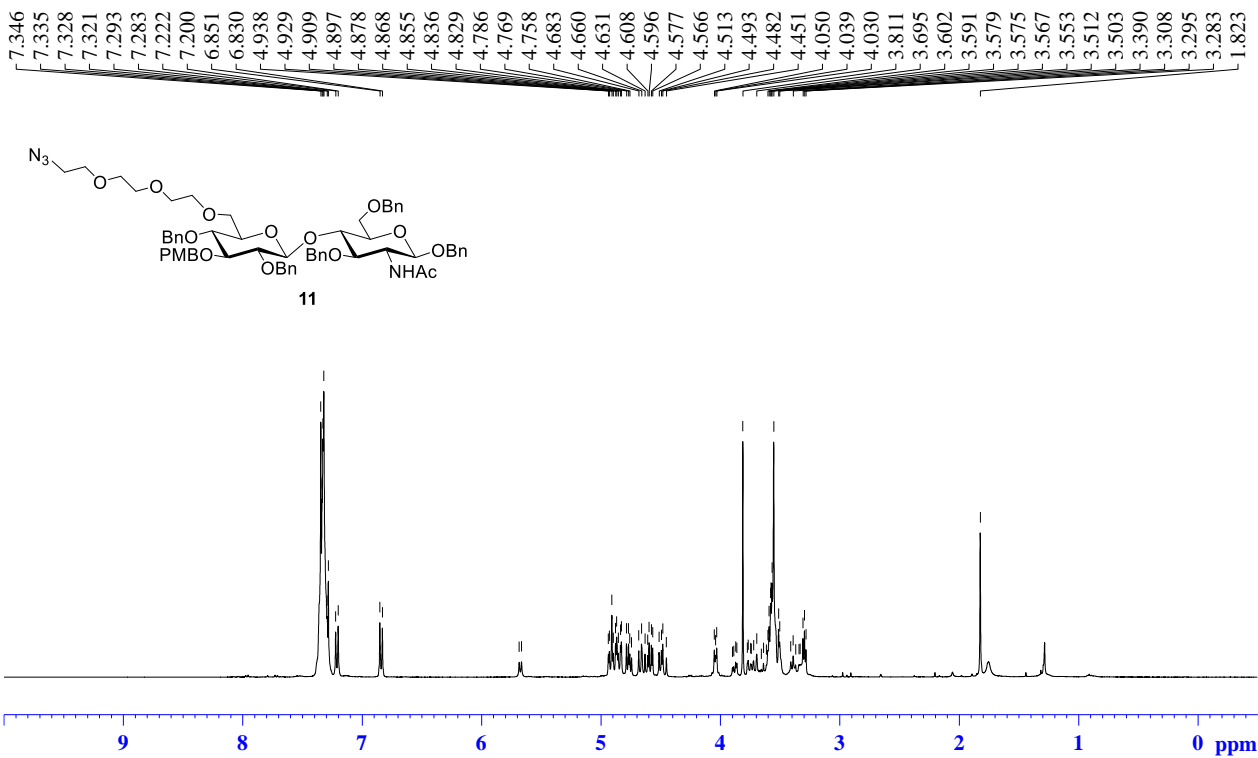

Compound 11: <sup>1</sup>H NMR (CDCl<sub>3</sub>, 400 MHz)

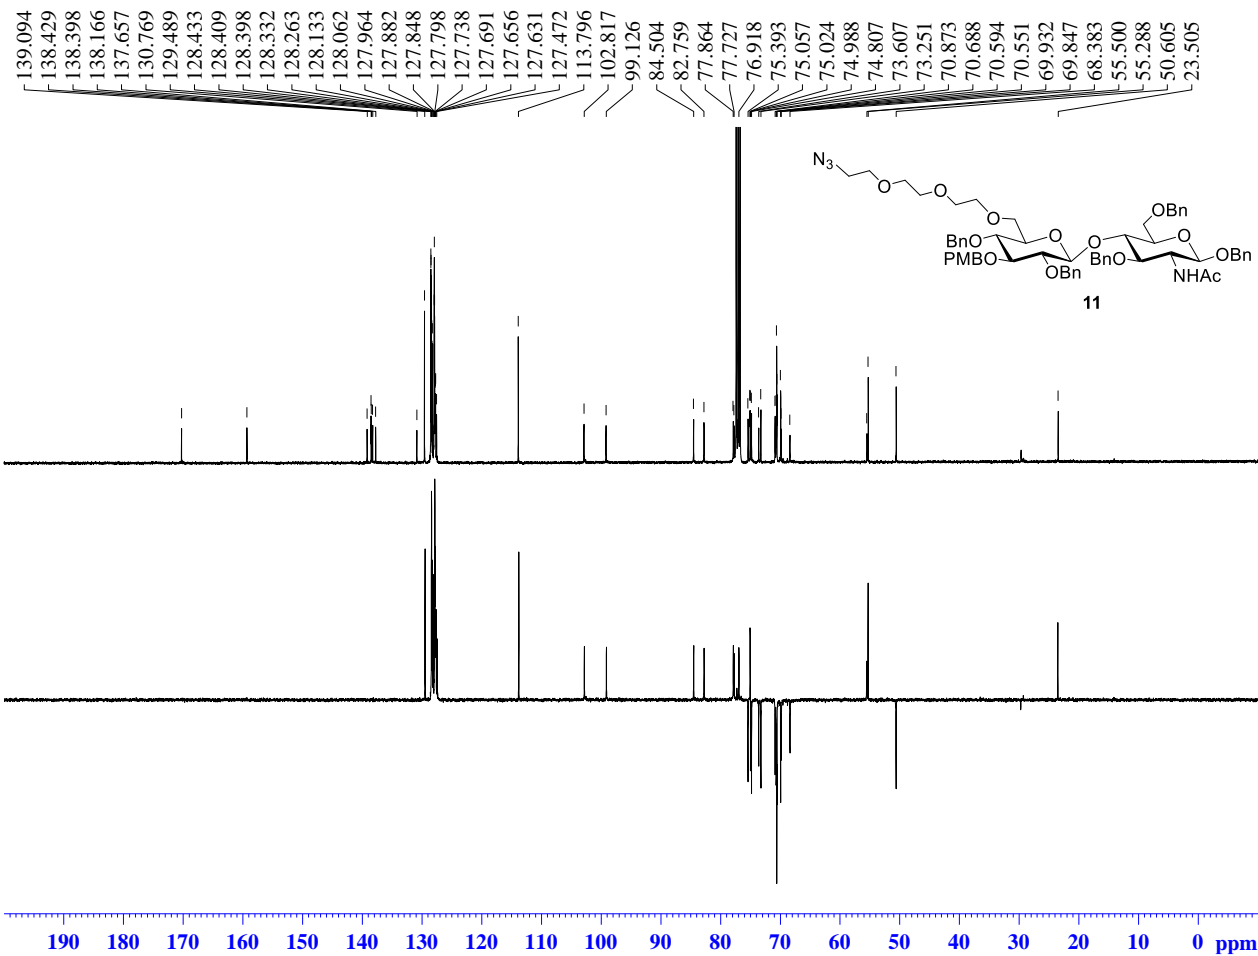

Compound 11: <sup>13</sup>C and Dept-135 NMR (CDCl<sub>3</sub>, 100 MHz)

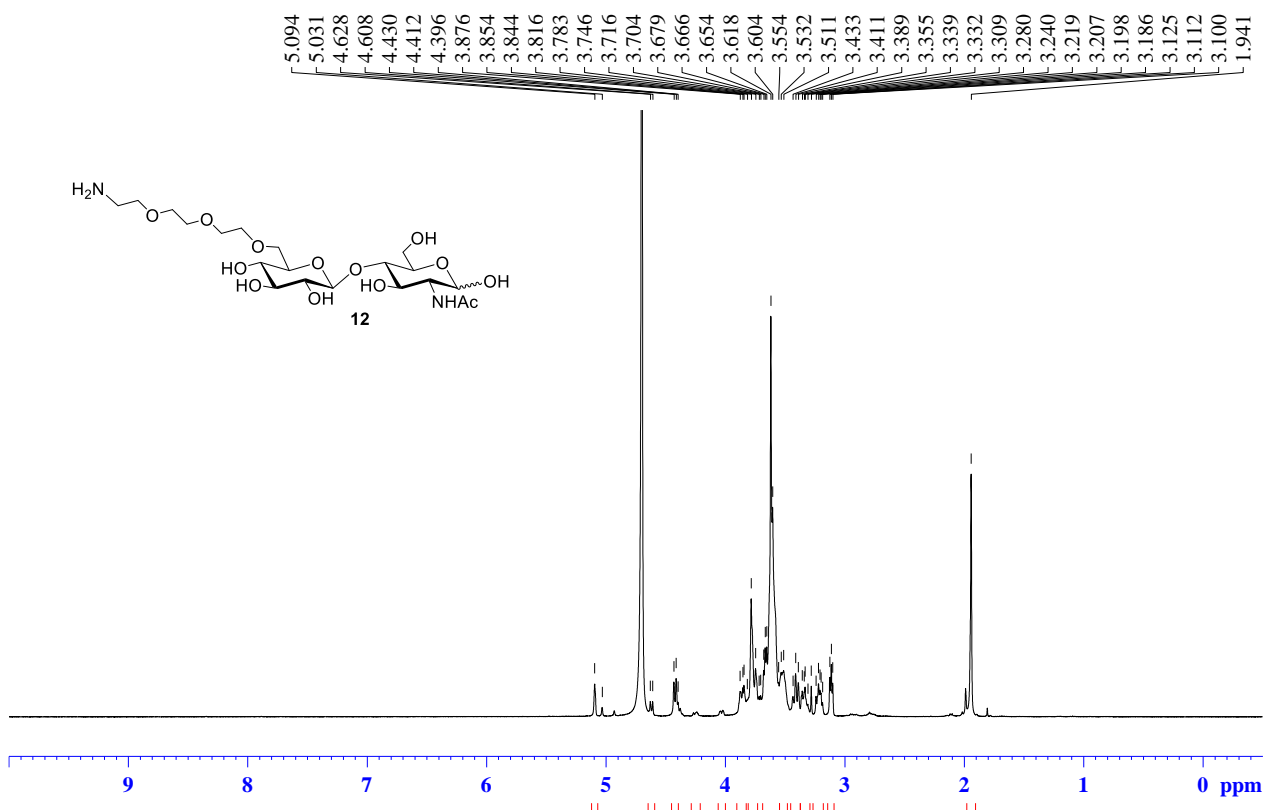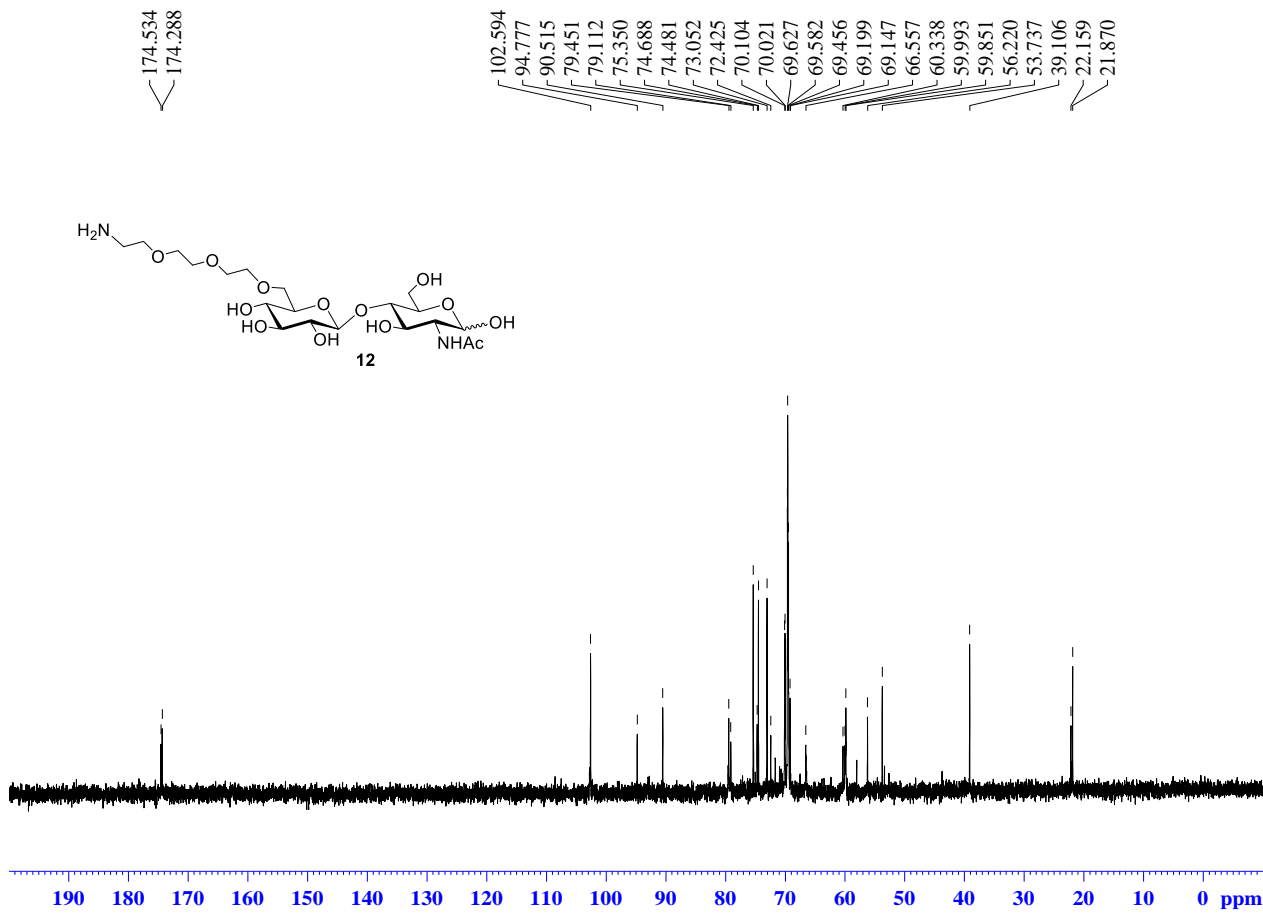



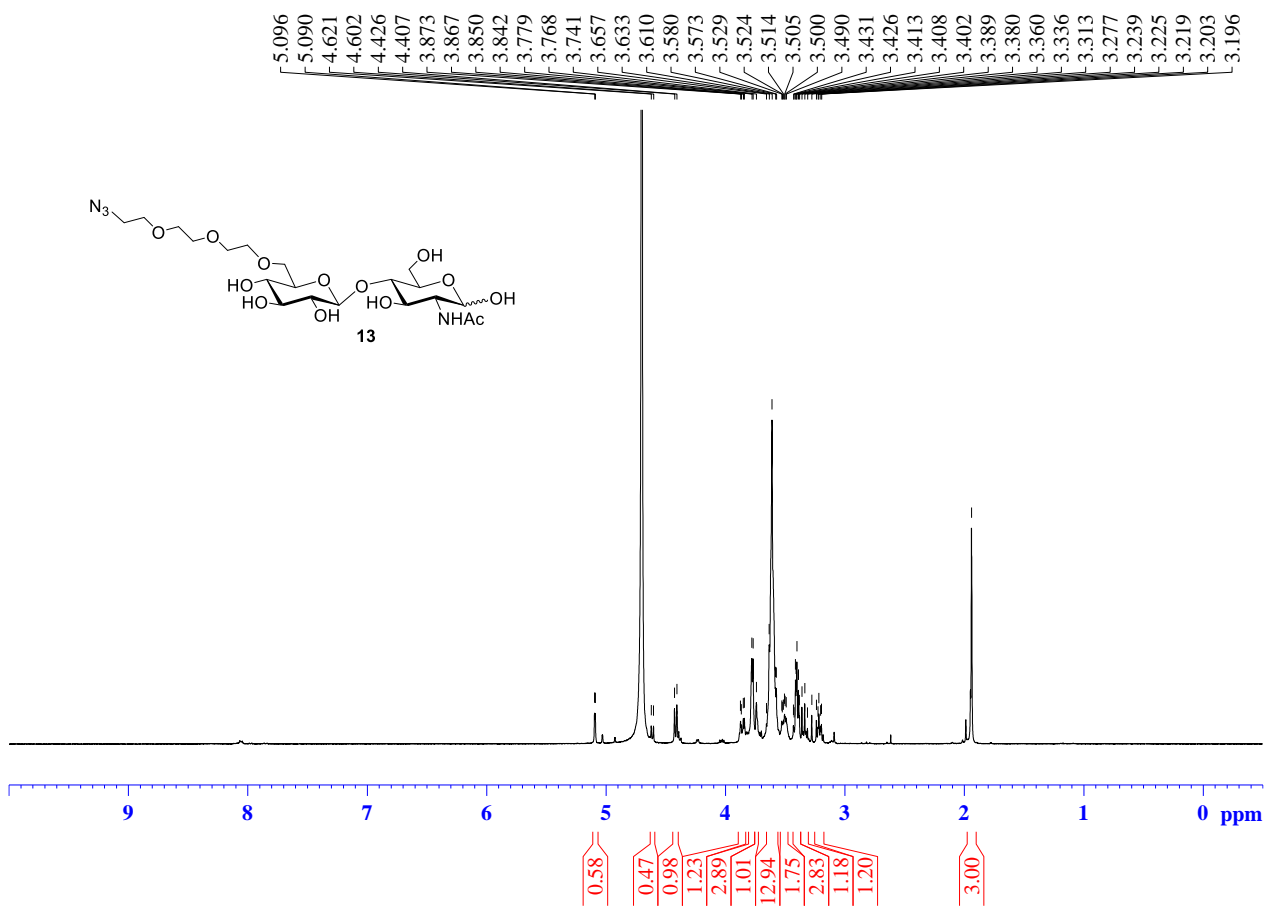

**Compound 13: <sup>1</sup>H NMR (D<sub>2</sub>O, 400 MHz)**

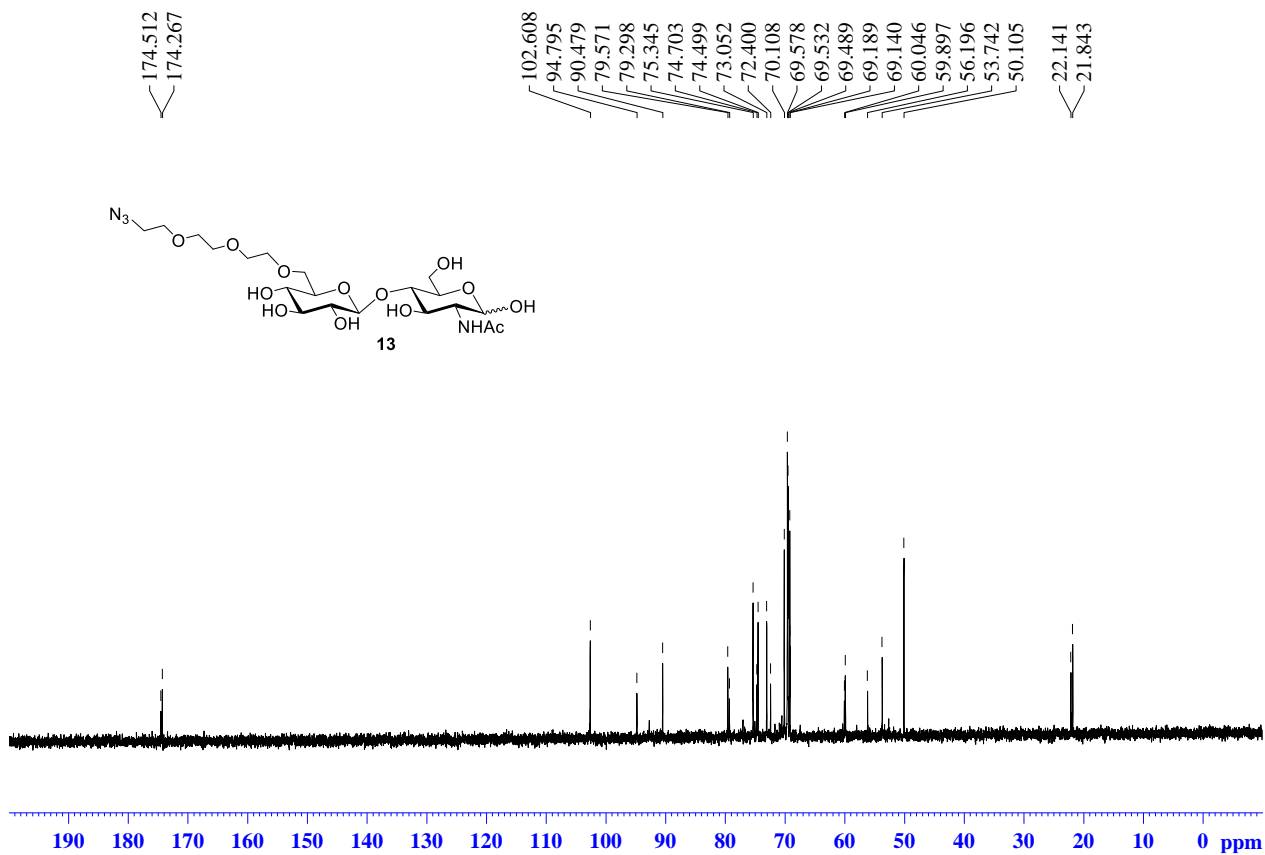

**Compound 13: <sup>13</sup>C NMR (D<sub>2</sub>O, 100 MHz)**

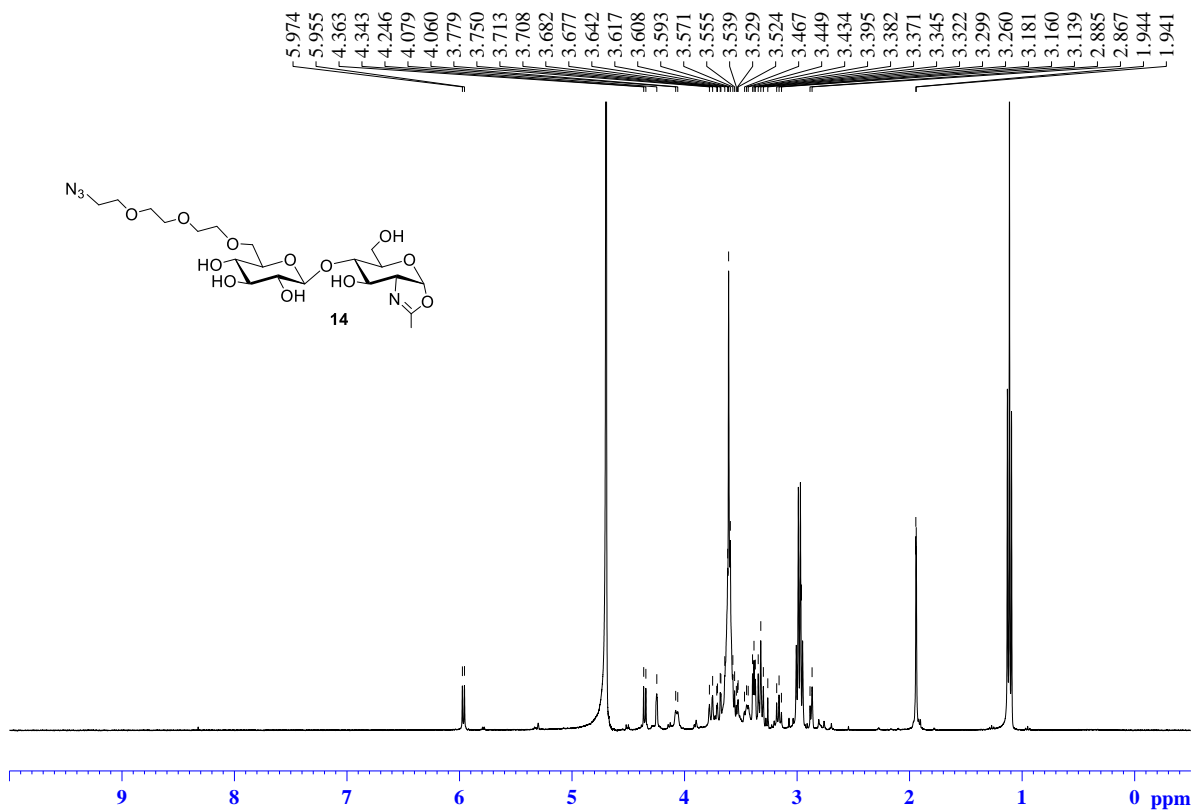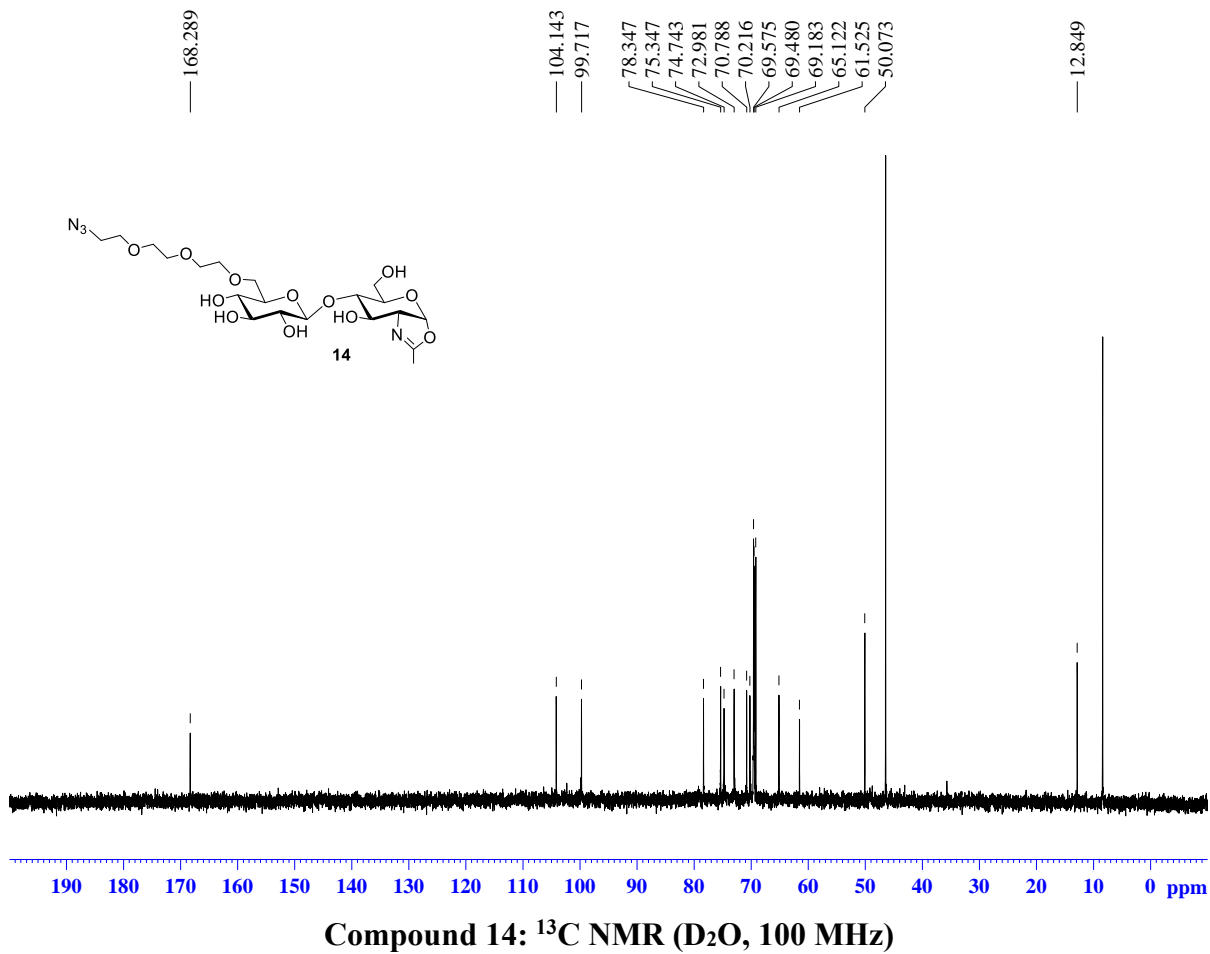

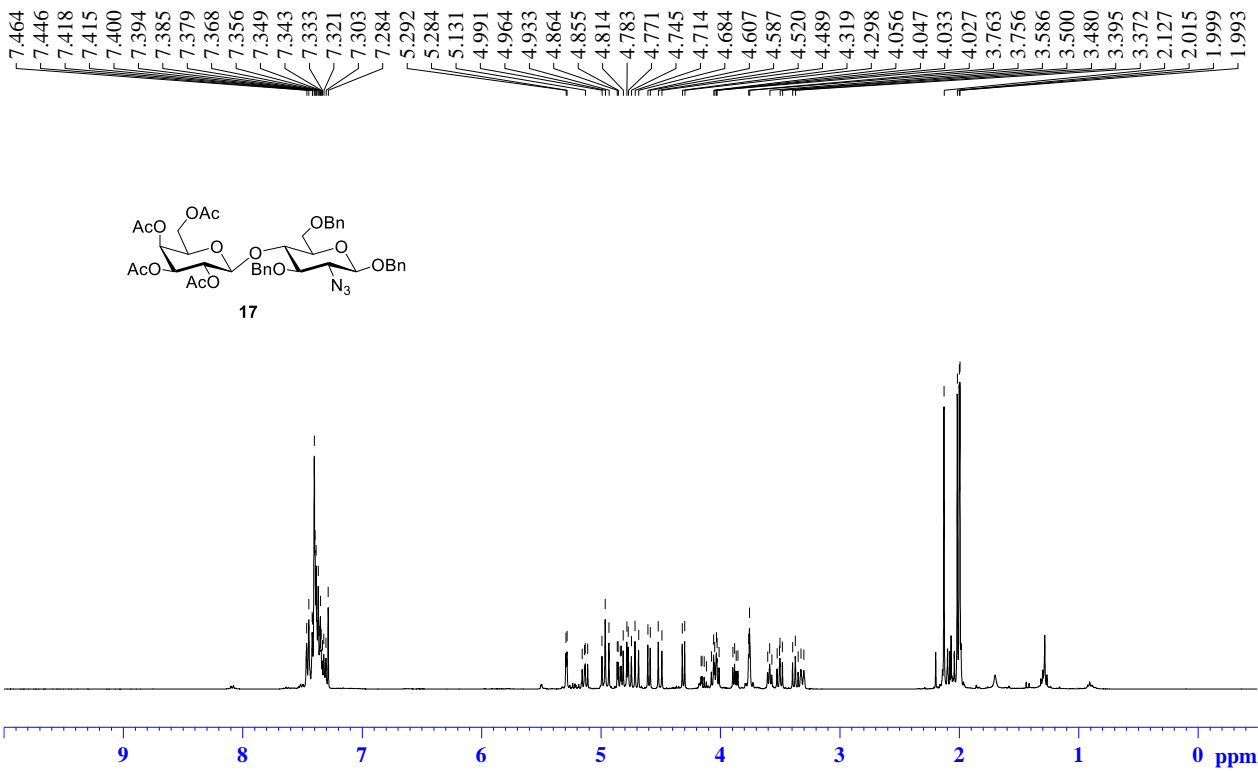

Compound 17:  $^1\text{H}$  NMR ( $\text{CDCl}_3$ , 400 MHz)

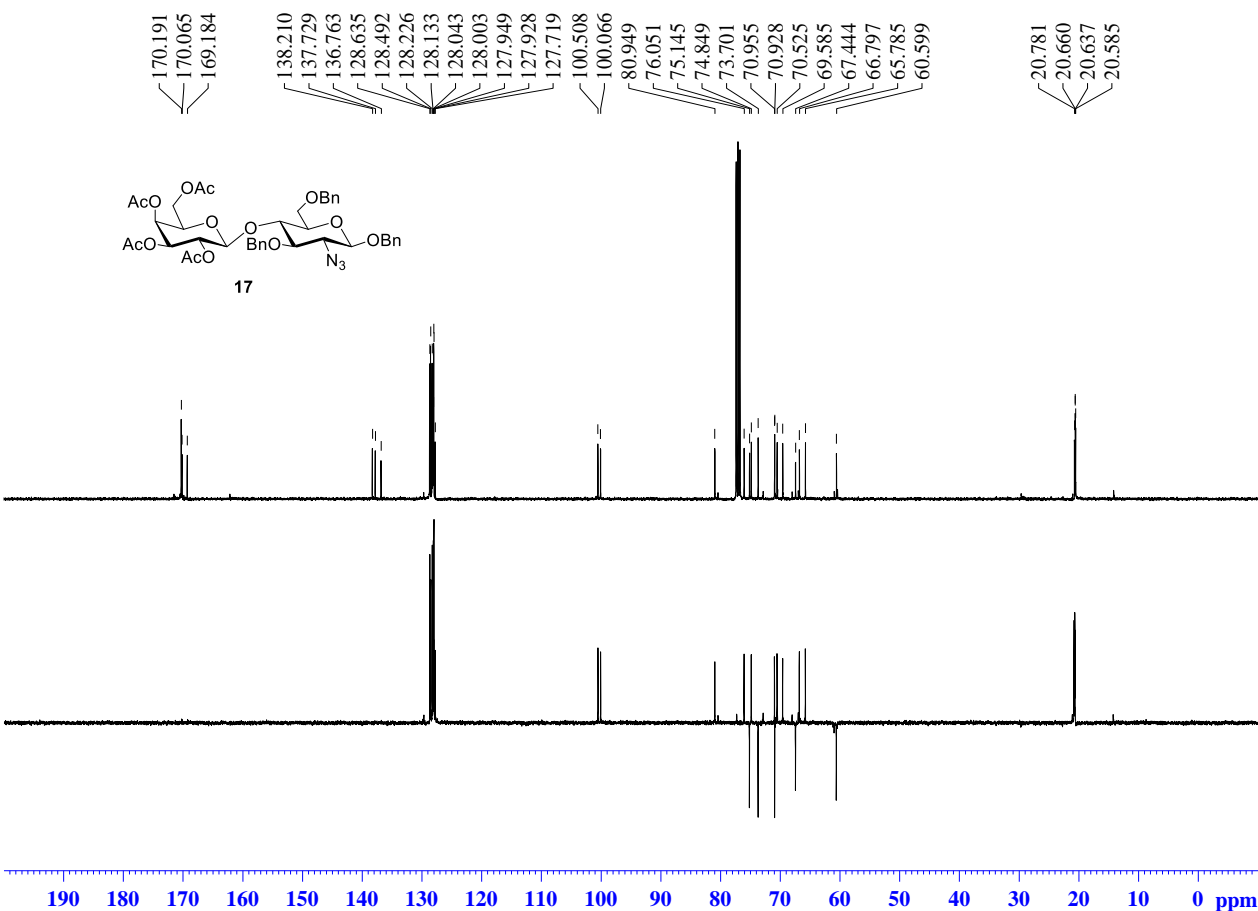

Compound 17:  $^{13}\text{C}$  and Dept- $^{135}\text{C}$  NMR ( $\text{CDCl}_3$ , 100 MHz)

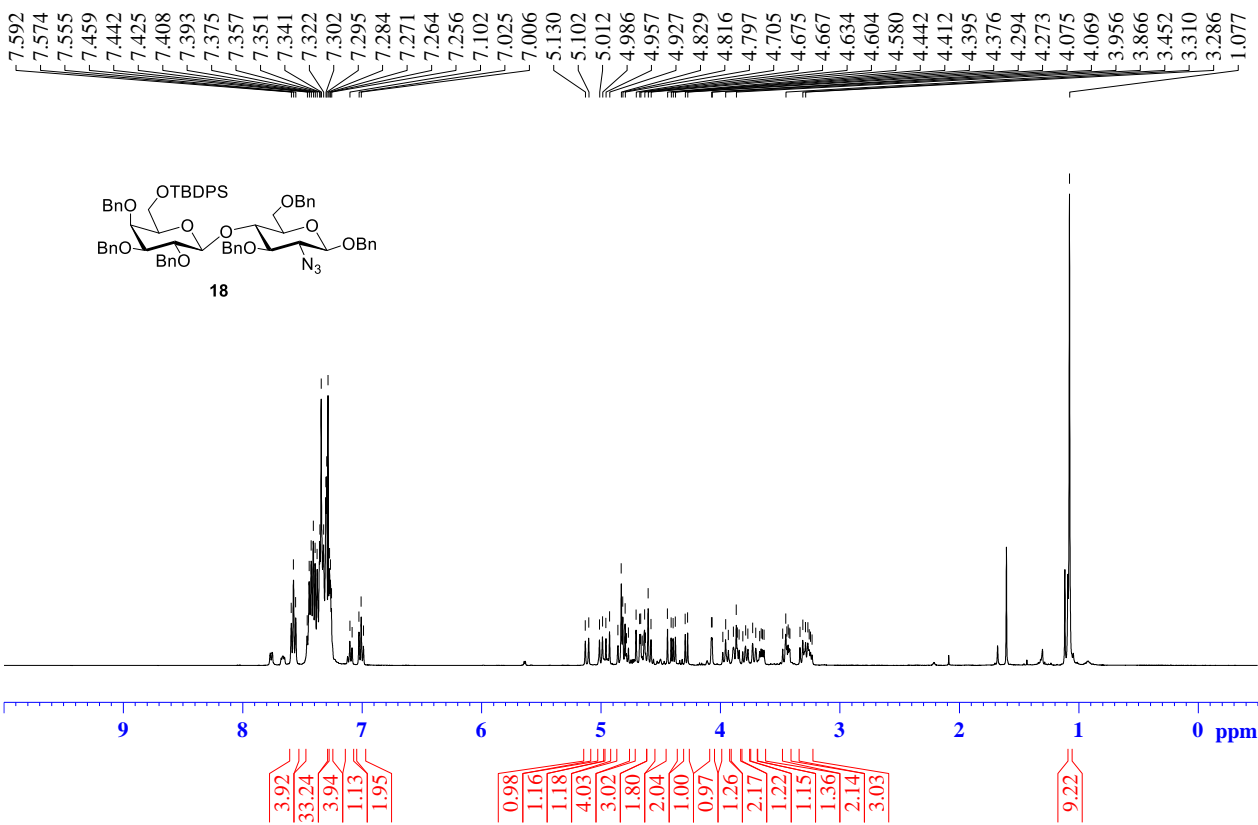

**Compound 18: <sup>1</sup>H NMR (CDCl<sub>3</sub>, 400 MHz)**

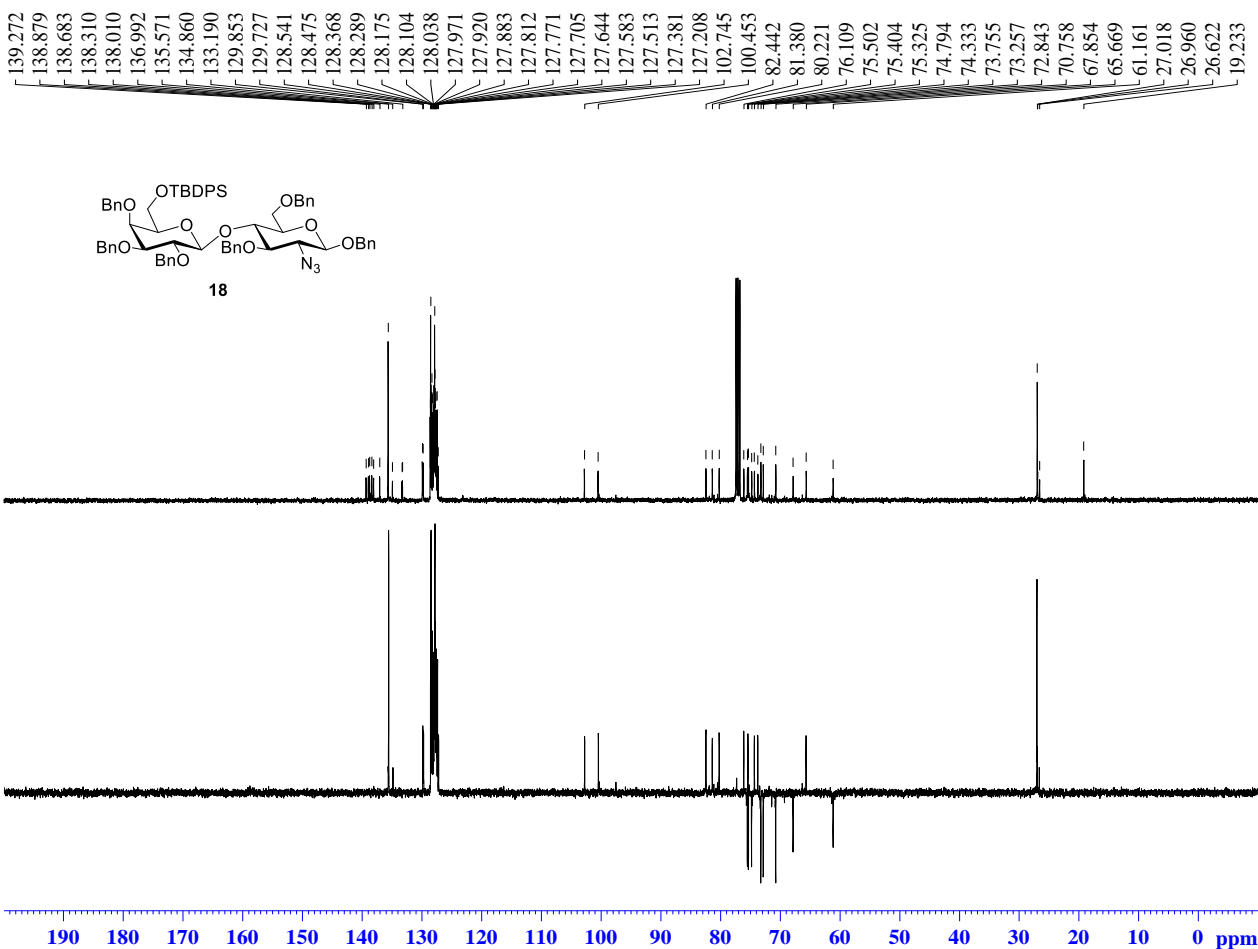

**Compound 18: <sup>13</sup>C and Dept-135 NMR (CDCl<sub>3</sub>, 100 MHz)**

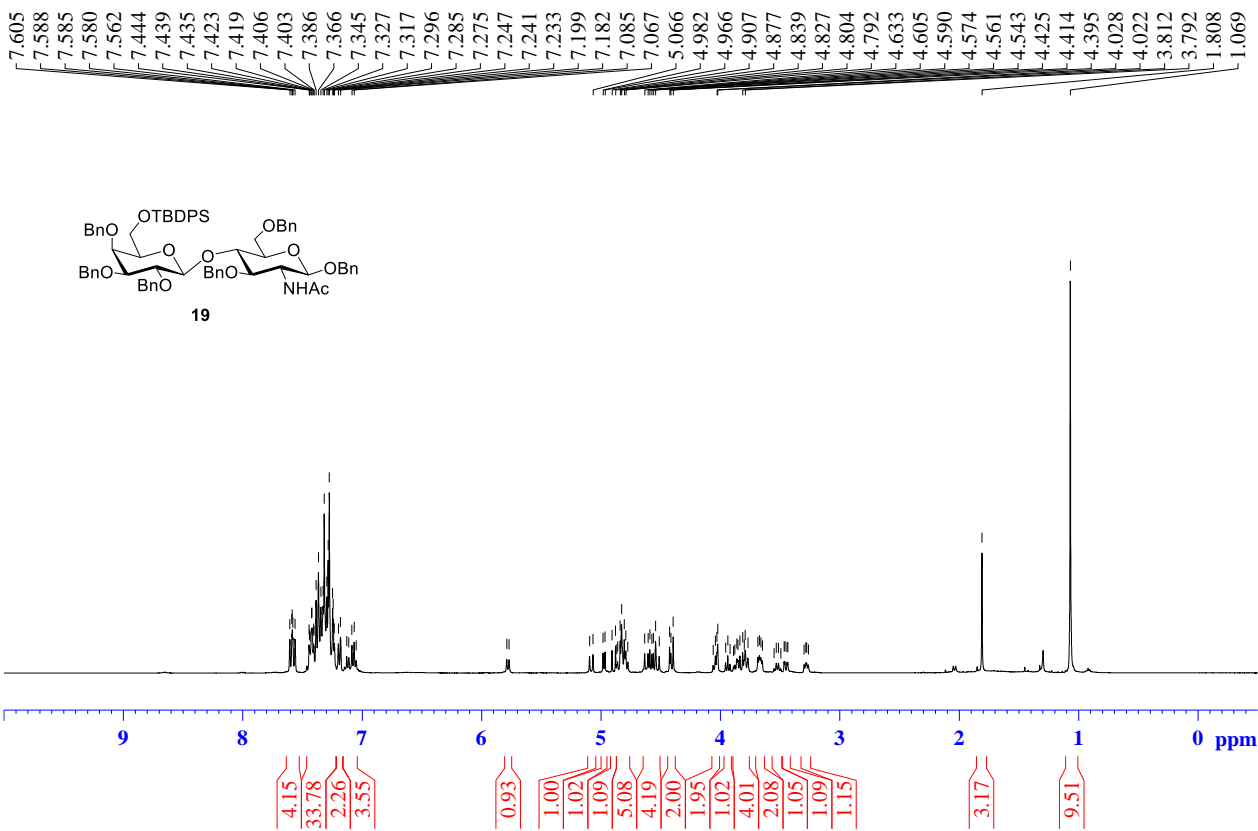

**Compound 19: <sup>1</sup>H NMR (CDCl<sub>3</sub>, 400 MHz)**

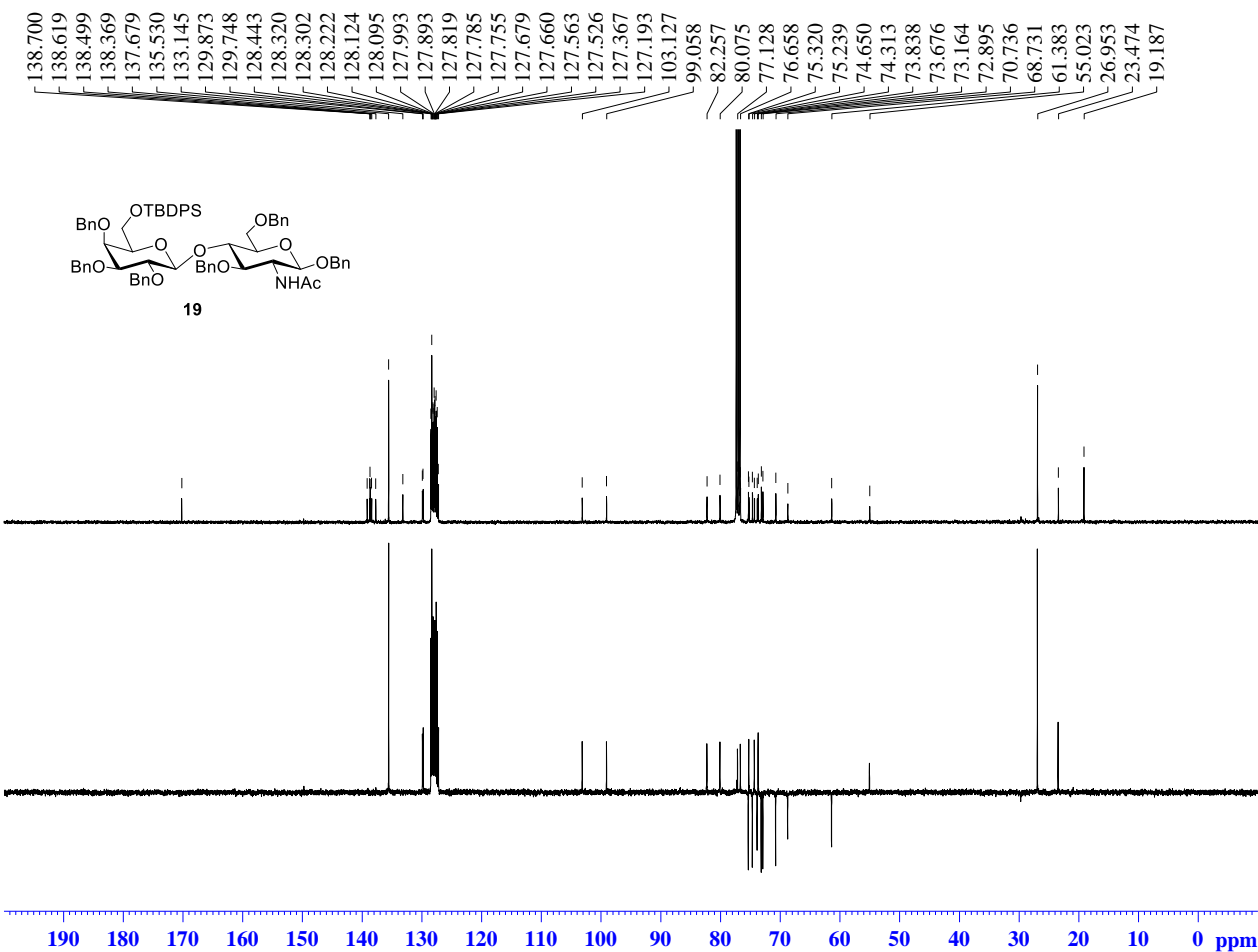

**Compound 19: <sup>13</sup>C and Dept-135 NMR (CDCl<sub>3</sub>, 100 MHz)**

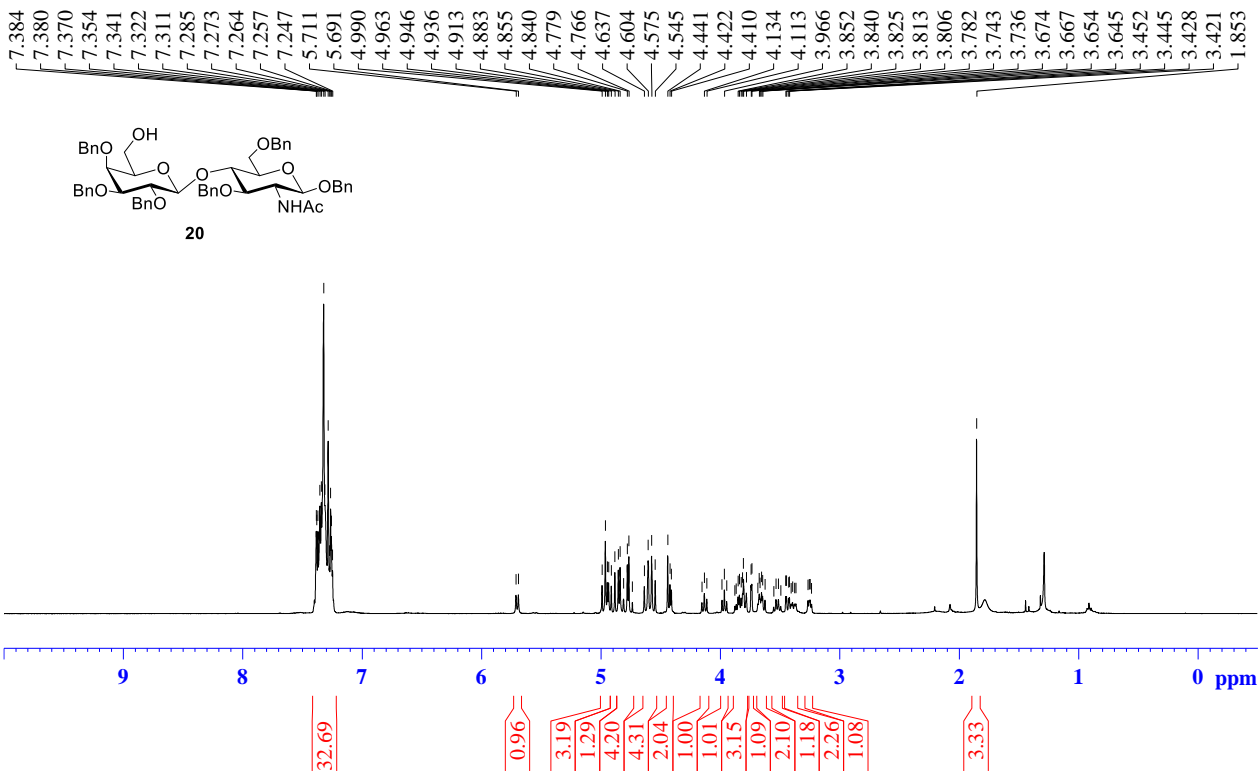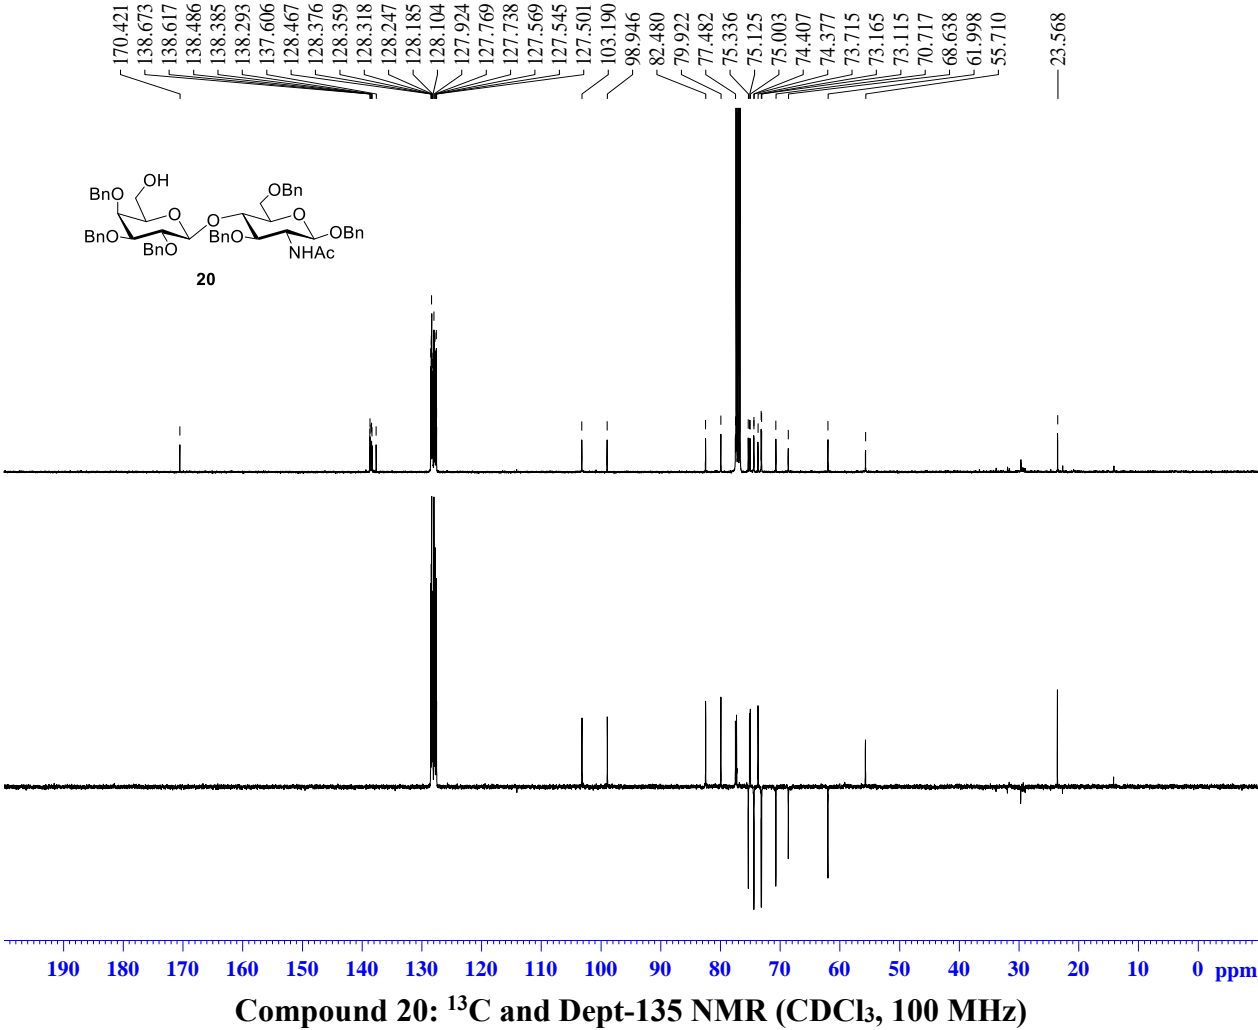

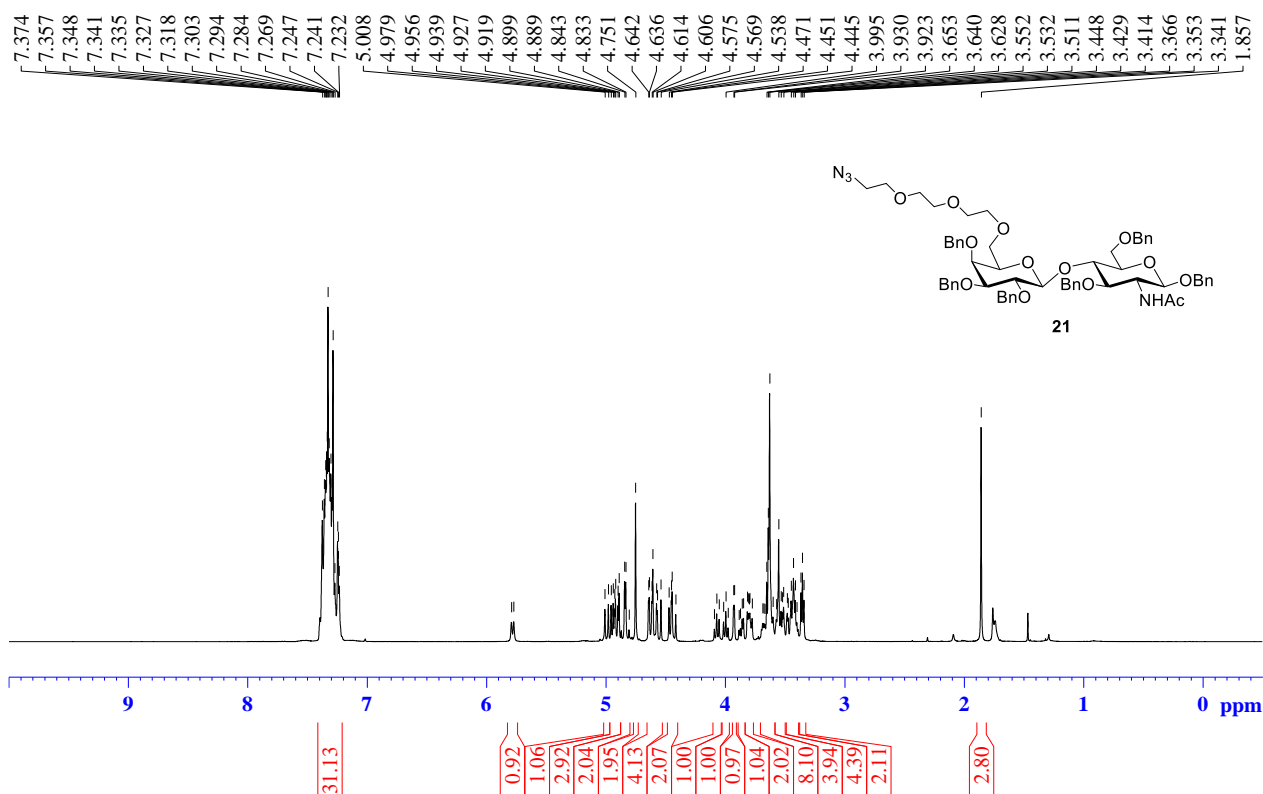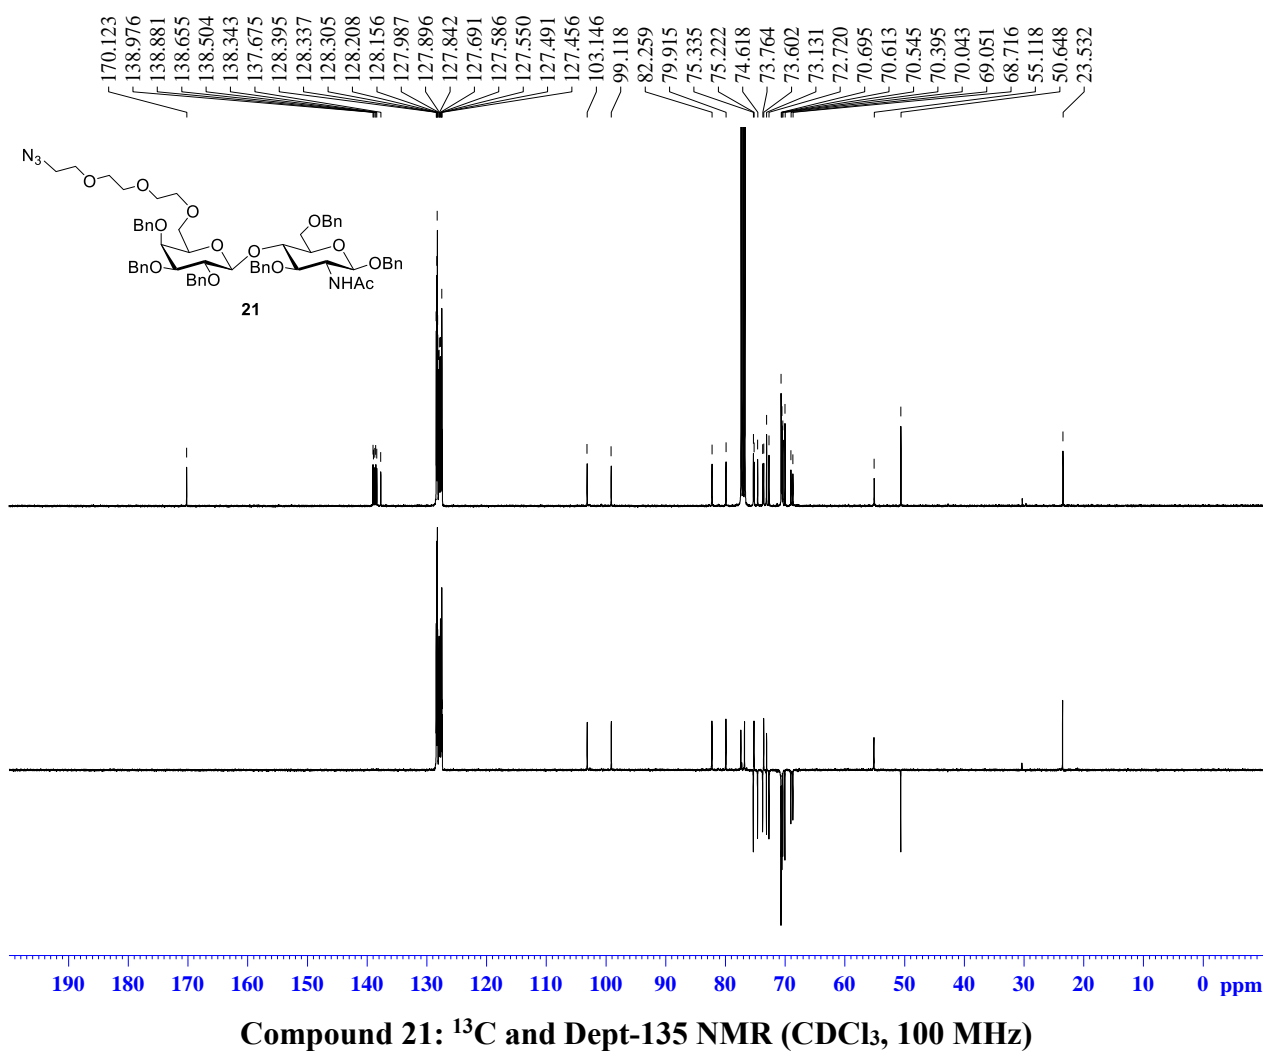

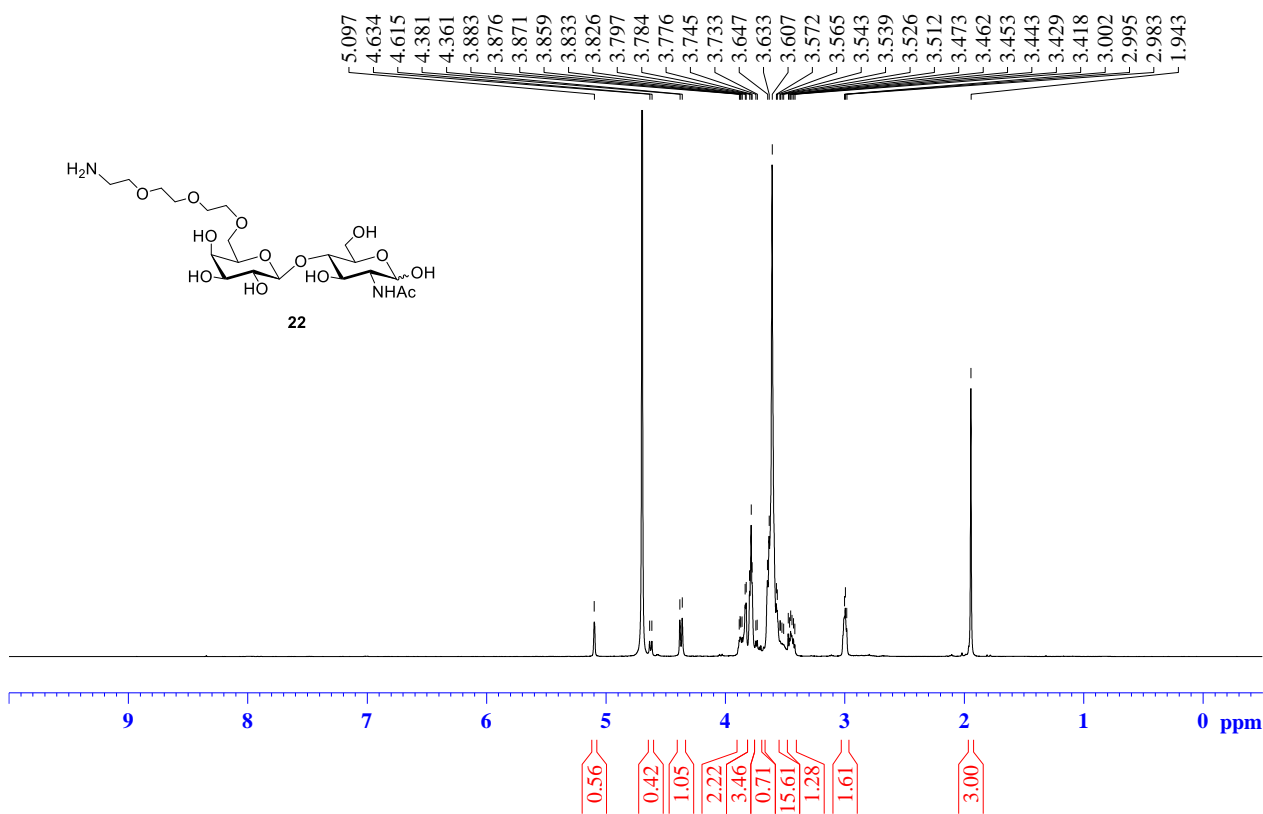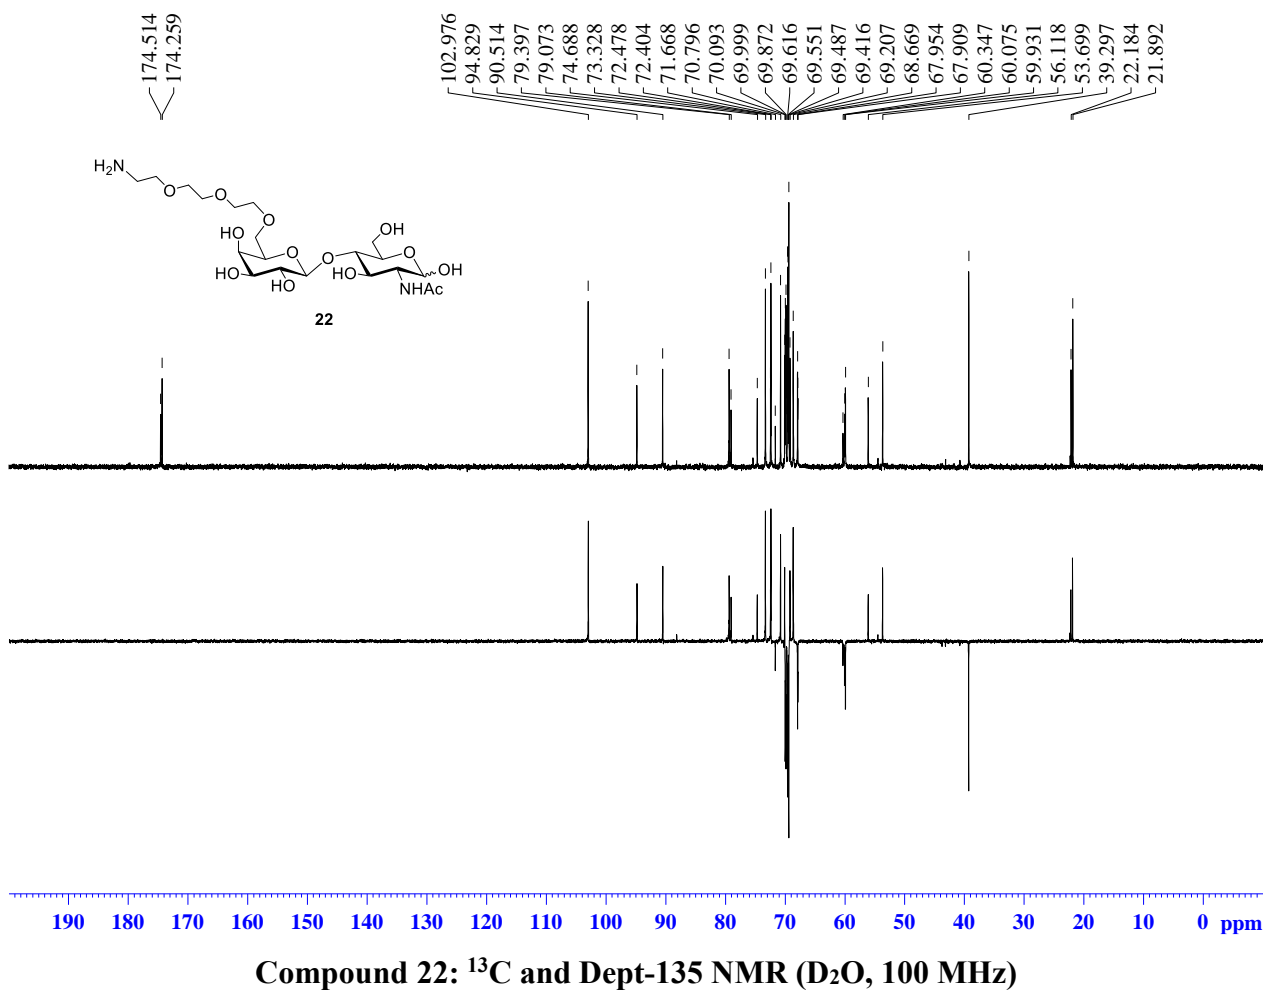



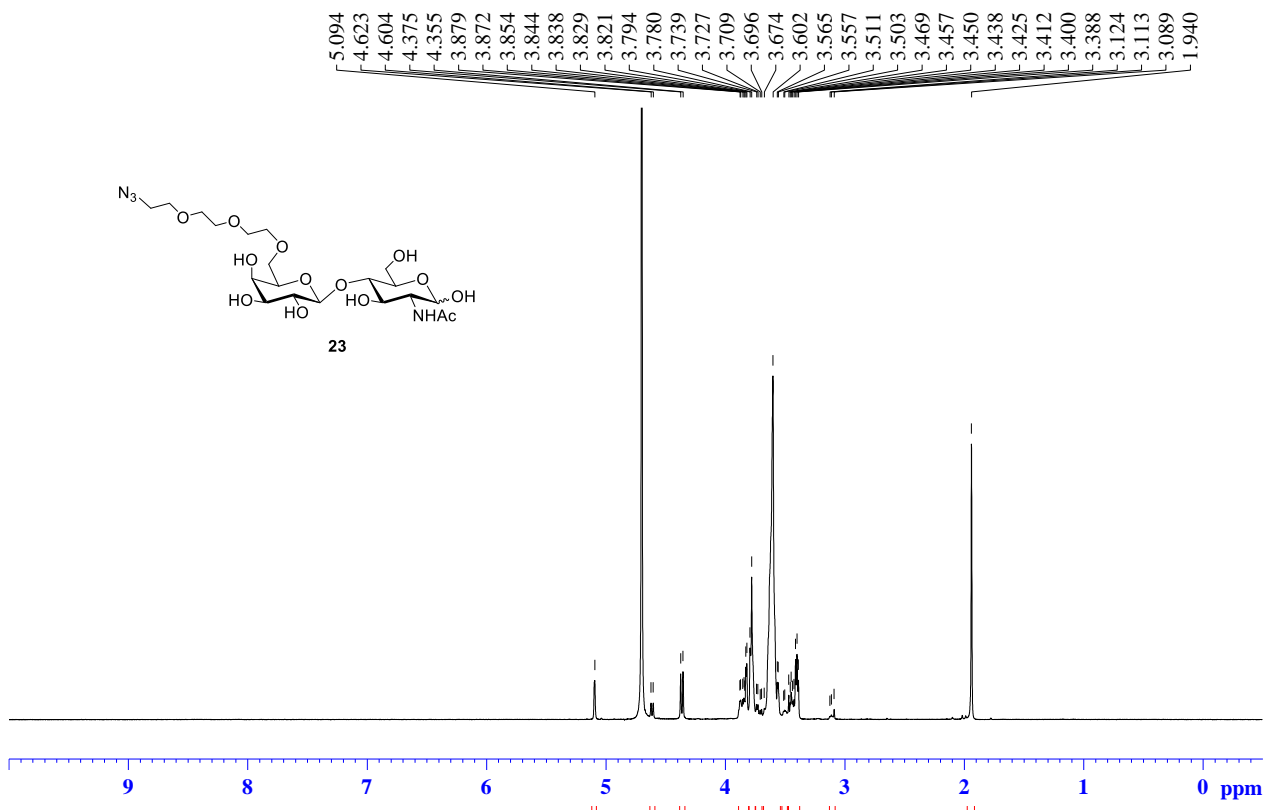

Compound 23:  $^1\text{H}$  NMR ( $\text{D}_2\text{O}$ , 400 MHz)

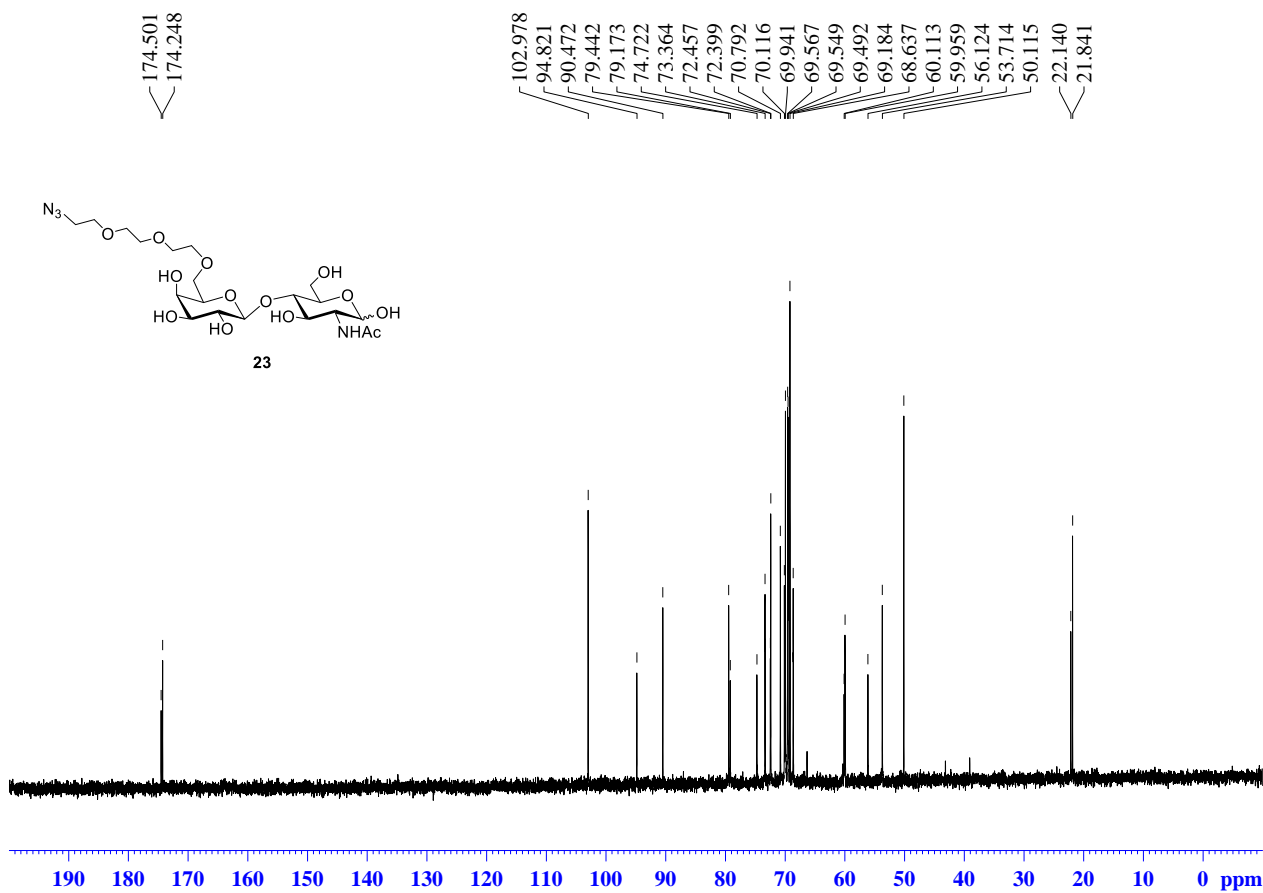

Compound 23:  $^{13}\text{C}$  NMR ( $\text{D}_2\text{O}$ , 100 MHz)

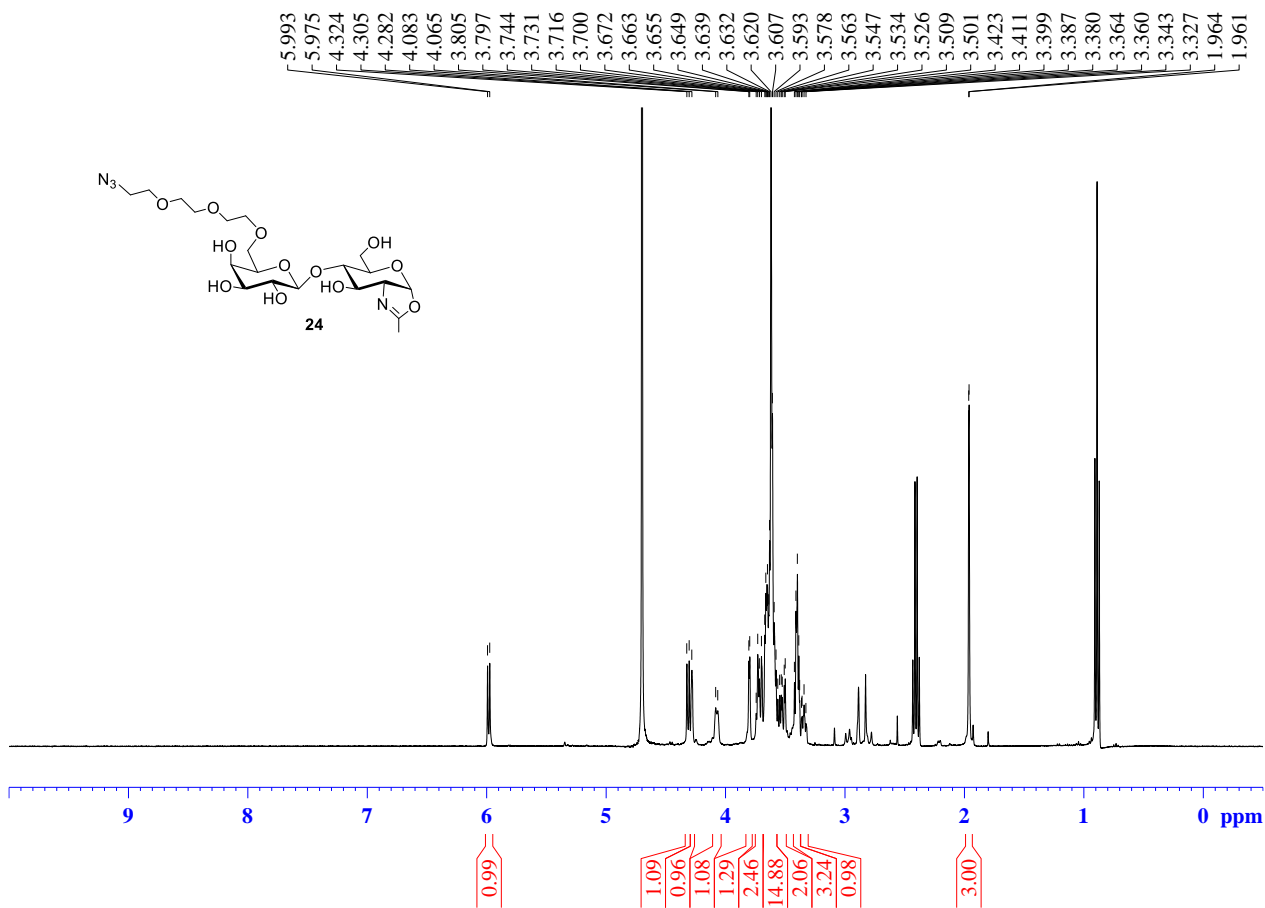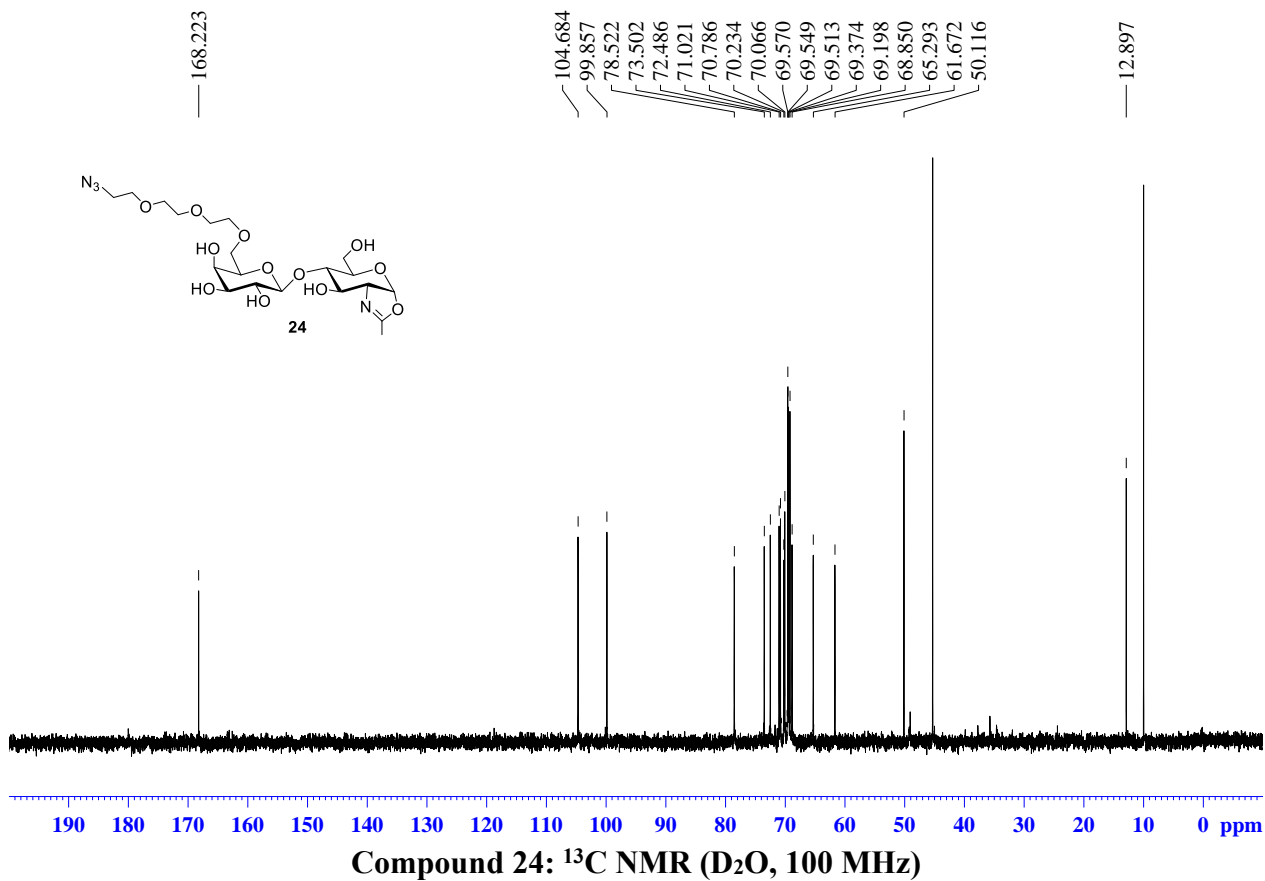

Supplement: NIHMS1823896-supplement-Supporting_Information.pdf [file NIHMS1823896-supplement-Supporting_Information.pdf]
